# Supplementary material
Source: PubMed Central journal article supplement (PMC9623478)
Supplement: jamapediatr-e223940-s001.pdf [file jamapediatr-e223940-s001.pdf]

## Supplemental Online Content

Falla K, Kuziek J, Mahnaz SR, Noel M, Ronksley PE, Orr SL. Anxiety and depressive symptoms and disorders in children and adolescents with migraine: a systematic review and meta-analysis. *JAMA Pediatr*. Published online October 31, 2022. doi:jamapediatrics.2022.3940

**eTable 1.** Summary of studies examining the association between migraine and anxiety and depressive symptoms/disorders (n=74)

**eTable 2.** Summary of studies examining migraine outcomes (n=18)

**eTable 3.** Summary of studies examining migraine incidence (n=2)

**eTable 4.** Risk of bias ratings for case-control studies

**eTable 5.** Risk of bias ratings for cross-sectional studies

**eTable 6.** Risk of bias ratings for cohort studies

**eFigure 1.** Results of meta-analyses comparing migraine to healthy controls for internalizing symptoms and disorders (presented in forest plots)

**eFigure 2.** Results of meta-analyses comparing migraine to other headache controls (presented in forest plots)

**eTable 7.** Sensitivity analyses with removal of outlying studies

This supplemental material has been provided by the authors to give readers additional information about their work.

**eTable 1. Summary of studies examining the association between migraine and anxiety and depressive symptoms/disorders (n=74)**

| Study                                                 | Design          | Location       | Setting                                                                       | Sample size                                       | Ages       | Sex                                                                     | Outcome                                                                                                                                  | Exposure                                                                                                                                                                           | Unadjusted results                                                                                                                                                                                                                                        | Adjusted results | Quality               |
|-------------------------------------------------------|-----------------|----------------|-------------------------------------------------------------------------------|---------------------------------------------------|------------|-------------------------------------------------------------------------|------------------------------------------------------------------------------------------------------------------------------------------|------------------------------------------------------------------------------------------------------------------------------------------------------------------------------------|-----------------------------------------------------------------------------------------------------------------------------------------------------------------------------------------------------------------------------------------------------------|------------------|-----------------------|
| Açkel B et al, 2021 <sup>22</sup>                     | Case-control    | Turkey         | Cases recruited from a neurology clinic and controls recruited from community | N=94 (37 with migraine, 22 with TTH, 35 controls) | 8-18 years | N= 56 females (59.6%); 38 males (40.4%)                                 | 1. Primary headache diagnosis according to ICHD-II criteria<br>2. General quality of life: Pediatric Quality of Life Inventory (Peds QL) | 1. Anxiety symptoms measured using the Screen for Child Anxiety Related Emotional Disorders (SCARED)<br>2. Depression symptoms measured using the Child Depression Inventory (CDI) | 1. Mean SCARED score was not significant different in migraine vs. control group (31.2±17.8 vs. 24.8±14.6; ANCOVA F(2)=1.586, p=0.211)<br>2. Mean CDI score was higher in migraine vs. control group* (15.6 ±5.8 vs. 9.6±5.7; ANCOVA F(2)=5.563, p=0.005) | N/A              | 6/7 domains adequate  |
| Albanês Oliveira Bernardo A et al, 2020 <sup>23</sup> | Cross-sectional | Recife, Brazil | Recruitment from pediatric clinics                                            | N=300 (253 with migraine, 47 with TTH)            | 6-17 years | Not reported for entire group; N= 132 females with migraine(52.1%); 121 | Primary headache diagnosis according to ICHD-III criteria                                                                                | 1. Clinical anxiety ascertained using a clinical cut-off of 41 on the State-Trait Anxiety                                                                                          | 1. N=61 (24.1%) of the migraine group had anxiety<br>2. N=4 (1.6%) of the                                                                                                                                                                                 | N/A              | 5/10 domains adequate |

|                                      |              |              |                                                      |                                |            |                             |                                             |                                                                                                                                                                                                                      |                                                                                                                                                                                                                            |                                                                                                                                                                           |                      |
|--------------------------------------|--------------|--------------|------------------------------------------------------|--------------------------------|------------|-----------------------------|---------------------------------------------|----------------------------------------------------------------------------------------------------------------------------------------------------------------------------------------------------------------------|----------------------------------------------------------------------------------------------------------------------------------------------------------------------------------------------------------------------------|---------------------------------------------------------------------------------------------------------------------------------------------------------------------------|----------------------|
|                                      |              |              |                                                      |                                |            | males with migraine (47.8%) |                                             | (STAI) Inventory to define anxiety<br>2. Clinical depression ascertained using a clinical cut-off of 17 on the Children's Depression Inventory (CDI) to define depression                                            | migraine group had depression                                                                                                                                                                                              |                                                                                                                                                                           |                      |
| Andrasik F et al, 1988 <sup>34</sup> | Case-control | Florida, USA | Recruitment from pediatric clinics and the community | N = 64 (32 cases, 32 controls) | 8-17 years | Not provided                | Migraine as per Prensky and Sommer criteria | 1. Depressive symptoms, measured using Children's Depression Inventory (CDI) for 8-13yo, or Beck Depression Inventory (BDI) for ≥14yo; Child Behavior Checklist-Internalizing Score (CBC-I) for all ages; Children's | 1. Mean CDI scores for 8-12yo: 8.7 for migraine vs. 4.0 for control group*; Mean BDI scores for ≥14yo: 9.1 for migraine vs. 3.1 for control group*; Mean CBC-I scores: 60.9 for migraine vs. 55.1 for control group*; Mean | 1. Migraine group scored higher on depression measures* (ANOVAs with age and sex): CDI, F (1, 34)=8.33, p<0.007; BDI F (1,21)=6.76, p<0.017; CDRS, F (1,52)=7.16, p<0.01; | 4/7 domains adequate |

|                                     |                 |                |                  |                                                      |                                    |                                        |                                              |                                                                                                                                                                                                                    |                                                                                                                                                                                                                       |                                                                                                                                                            |                       |
|-------------------------------------|-----------------|----------------|------------------|------------------------------------------------------|------------------------------------|----------------------------------------|----------------------------------------------|--------------------------------------------------------------------------------------------------------------------------------------------------------------------------------------------------------------------|-----------------------------------------------------------------------------------------------------------------------------------------------------------------------------------------------------------------------|------------------------------------------------------------------------------------------------------------------------------------------------------------|-----------------------|
|                                     |                 |                |                  |                                                      |                                    |                                        |                                              | Depression Rating Scale (CDRS) for all ages<br>2. Anxiety symptoms, measured using State-Trait Anxiety Inventory for Children (STAIC) for 7-12yo, or State-Trait Anxiety Inventory Form X (STAIX) for $\geq 13$ yo | Children's Depression Rating Scale for all ages: 20.7 for migraine group vs. 17.6 in control group*<br>2. Mean STAIC for 7-12yo: not reported; Mean STAIX for $>13$ yo: 39.1 for migraine vs. 30.2 for control group* | CBC-IF (1,54)=4.96, $p<0.03$<br>2. $\geq 13$ yo migraine group scored higher on STAIX*: $F(1, 25)=7.16$ , $p<0.04$                                         |                       |
| Anttila P et al, 2004 <sup>45</sup> | Cross-sectional | Turku, Finland | Population-based | N=183 (32.2% migraine, 35.6% TTH, 32.2% no headache) | 11-13 years (sixth grade students) | N=90 females (49.1%); 93 males (50.8%) | Primary headache diagnosis according to ICHD | 1. Depressive symptoms, measured using Children's Depression Inventory (CDI)<br>2. Internalizing symptoms measured using Child Behavior Checklist (CBCL) given to parents                                          | 1. No difference in CDI depression scores between migraine ( $5.2 \pm 4.7$ ) vs. no headache ( $4.4 \pm 4.3$ ) ( $p=0.59$ in ANOVA)<br>2. CBCL internalizing subscale significantly higher in                         | 1. No difference in CDI depression scores between migraine ( $5.2 \pm 4.7$ ) vs. no headache ( $4.4 \pm 4.3$ ) ( $p=0.55$ in ANCOVA) after controlling for | 9/10 domains adequate |

|                                    |              |               |                                                                                        |                                               |             |                                       |              |                                                                                                              |                                                                                                                              |                                                                                                                                                                                                                                 |                      |
|------------------------------------|--------------|---------------|----------------------------------------------------------------------------------------|-----------------------------------------------|-------------|---------------------------------------|--------------|--------------------------------------------------------------------------------------------------------------|------------------------------------------------------------------------------------------------------------------------------|---------------------------------------------------------------------------------------------------------------------------------------------------------------------------------------------------------------------------------|----------------------|
|                                    |              |               |                                                                                        |                                               |             |                                       |              |                                                                                                              | migraine (7.0 ± 5.4) vs. no headache*(4.4 ± 3.8) (p<0.01 in ANOVA)                                                           | gender, age, and socioeconomic status<br>2. CBCL internalizing subscale significantly higher in migraine (7.0 ± 5.4) vs. no headache (4.4 ± 3.8) (p=0.03 in ANCOVA) after controlling for gender, age, and socioeconomic status |                      |
| Araujo G et al, 2020 <sup>56</sup> | Case-control | Missouri, USA | Cases recruited from clinics (not specified what type) and unclear where controls were | N=40 (57.5% chronic migraine; 42.5% controls) | 12-17 years | N=31 females (77.5%); 9 males (22.5%) | Not provided | Depression symptoms measured using the Children's Depression Inventory (CDI), and clinical cut-offs used and | The migraine group had higher CDI scores* (50.2±9.7 vs. 43.4 ±7.7); there was no significant difference between migraine vs. | N/A                                                                                                                                                                                                                             | 3/7 domains adequate |

|                                    |                 |                   |                  |                                                                                  |                                   |                                              |                                                |                                                                                                                                   |                                                                                                                                                                                                                                                                                                      |                                                                                                                                                                                                                                 |                       |
|------------------------------------|-----------------|-------------------|------------------|----------------------------------------------------------------------------------|-----------------------------------|----------------------------------------------|------------------------------------------------|-----------------------------------------------------------------------------------------------------------------------------------|------------------------------------------------------------------------------------------------------------------------------------------------------------------------------------------------------------------------------------------------------------------------------------------------------|---------------------------------------------------------------------------------------------------------------------------------------------------------------------------------------------------------------------------------|-----------------------|
|                                    |                 |                   | recruited from   |                                                                                  |                                   |                                              |                                                | defined as a T score $\geq 60$                                                                                                    | control group on proportion with clinically elevated depression (p=0.06)                                                                                                                                                                                                                             |                                                                                                                                                                                                                                 |                       |
| Arruda M et al, 2012 <sup>67</sup> | Cross-sectional | São Paulo, Brazil | Population-based | N=1,856 (23% migraine, 28.9% TTH and 18.6% controls)                             | 5-12 years                        | N=897 females (48.3%); 959 males (51.7%)     | Primary headache diagnosis according to ICHD-2 | Clinically relevant anxious/depressed and internalizing symptoms measured using cut-offs from the Child Behavior Checklist (CBCL) | Children with migraine were more likely to have clinically relevant anxious/depressed scores* (15.0% vs. 3.5%, RR=4.3, 95% CI=2.4-7.8, p<0.01) as compared to no headache group, and more likely to have clinically relevant internalizing scores* (56.8% vs. 19.1%, RR=2.7, 95% CI=2.1-3.4, p<0.01) | Children with migraine were more likely to have clinically relevant anxiety/depression (p<0.05) and internalizing scores (p<0.05) compared to controls, after controlling for age, race, gender, headache frequency, and income | 9/10 domains adequate |
| Bektas Ö et al, 2015 <sup>78</sup> | Cross-sectional | Ankara, Turkey    | Population-based | N=5,355 (10.3% migraine, 9.8% probable migraine, 16.5% TTH, 2.9% other headache, | 9-18 years (mean 13.4 $\pm$ 2.68) | N=2,708 females (50.6%); 2,647 males (49.4%) | Primary headache diagnosis according to ICHD-2 | 1. Clinically relevant depression measured using cut-off of Child Depression Scale from                                           | 1. Mean depression score 13.6 $\pm$ 6.80 for migraine vs. 9.3 $\pm$ 6.17 for no headache*; Migraine group more                                                                                                                                                                                       | Anxiety was associated with migraine* (OR=1.45, 95% CI=1.16-1.82, p=0.001)                                                                                                                                                      | 9/10 domains adequate |

|                                    |                 |                               |                  |                                                   |             |              |                                                                                                                   |                                                                                                                                                                                              |                                                                                                                                                                                                                                                          |                                                                                                                                                        |                       |
|------------------------------------|-----------------|-------------------------------|------------------|---------------------------------------------------|-------------|--------------|-------------------------------------------------------------------------------------------------------------------|----------------------------------------------------------------------------------------------------------------------------------------------------------------------------------------------|----------------------------------------------------------------------------------------------------------------------------------------------------------------------------------------------------------------------------------------------------------|--------------------------------------------------------------------------------------------------------------------------------------------------------|-----------------------|
|                                    |                 |                               |                  | 60.6% no headache)                                |             |              |                                                                                                                   | Association of Turkish Child Psychiatry (validated)<br>2. Clinically relevant anxiety using cut-off from Turkish version of Beck Anxiety Score<br>*Diagnoses confirmed by child psychiatrist | likely to have clinically relevant depression* (29.6% vs. 13.8%, p<0.05)<br>2. Mean anxiety score 17.5 ± 12.19 for migraine vs. 10.2 ± 8.88 for no headache*; Migraine group more likely to have clinically relevant anxiety* (43.5% vs. 19.8%, p=0.001) | after controlling for maternal education, obesity, low grade point average and PedMIDAS score                                                          |                       |
| Blaauw B et al, 2014 <sup>89</sup> | Cross-sectional | Nord-Trondelag County, Norway | Population-based | N=4,872 (Recurrent headache 29.0%, migraine 2.8%) | 12-17 years | Not provided | Participants read description of migraine, TTH and non-classifiable headache in accordance with ICHD criteria and | Symptom Check List (SCL-5) used to measure depression and anxiety symptoms                                                                                                                   | Not reported separately for migraine (reported as recurrent headache vs. headache free)                                                                                                                                                                  | Migraine group aged 12-14 years had higher odds of symptoms of anxiety and depression* (OR=1.69, 95%CI=1.15-2.49, p=0.007) after adjusting for sex and | 8/10 domains adequate |

|                                      |                 |             |               |                    |            |                                        |                                                                                            |                                                                                                                                                      |                                                                                                                                                                                        |                                                                                                                                                                                                                               |                       |
|--------------------------------------|-----------------|-------------|---------------|--------------------|------------|----------------------------------------|--------------------------------------------------------------------------------------------|------------------------------------------------------------------------------------------------------------------------------------------------------|----------------------------------------------------------------------------------------------------------------------------------------------------------------------------------------|-------------------------------------------------------------------------------------------------------------------------------------------------------------------------------------------------------------------------------|-----------------------|
|                                      |                 |             |               |                    |            |                                        | classified according to validated “recognition-based” headache diagnosis approach by nurse |                                                                                                                                                      |                                                                                                                                                                                        | family condition/single parenthood; Migraine group aged 15-17 years had higher odds of symptoms of anxiety and depression* (OR=2.12, 95%CI=1.65-2.72, p<0.001) after adjusting for sex and family condition/single parenthood |                       |
| Braccili T et al, 1999 <sup>94</sup> | Cross-sectional | Rome, Italy | Not described | N=73 with migraine | 8-14 years | N=34 females (46.6%); 39 males (53.4%) | Migraine diagnosis according to ICHD-I criteria                                            | 1. Depressive symptoms measured with Child Depression Scale (CDI)<br>2. Anxiety symptoms measured with Anxiety Scale Questionnaire for Evolutive Age | Participants divided into 3 groups:<br>1. Anxiety and depression = 21.9%<br>2. Depression = 53.4%<br>3. No anxiety or depression = 24.6%<br>NB. used “Sample Classification” to define | N/A                                                                                                                                                                                                                           | 3/10 domains adequate |



|                                    |              |                 |                                                                                               |                                      |            |                                         |                                                   |                                                                                                                                                                                                                                                                                                                                              |                                                                                                                                                                                                                                                                                                                                                                                  |     |                      |
|------------------------------------|--------------|-----------------|-----------------------------------------------------------------------------------------------|--------------------------------------|------------|-----------------------------------------|---------------------------------------------------|----------------------------------------------------------------------------------------------------------------------------------------------------------------------------------------------------------------------------------------------------------------------------------------------------------------------------------------------|----------------------------------------------------------------------------------------------------------------------------------------------------------------------------------------------------------------------------------------------------------------------------------------------------------------------------------------------------------------------------------|-----|----------------------|
|                                    |              |                 |                                                                                               |                                      |            |                                         |                                                   |                                                                                                                                                                                                                                                                                                                                              | groups, unclear if validated cut-offs; no hypothesis testing done                                                                                                                                                                                                                                                                                                                |     |                      |
| Cooper P et al, 1987 <sup>95</sup> | Case-control | Halifax, Canada | Cases recruited from a neurology clinic and controls were best friend controls from community | N=78 (39 with migraine, 39 controls) | 6-16 years | N=40 females (51.2%) ; 38 males (48.7%) | Migraine diagnosis according to Prenskey criteria | 1. Anxiety symptoms measured using State-Trait Anxiety Inventory for Children (STAIC), the Revised Children's Manifest Anxiety Scale (RCMAS), and parent-reported child anxiety via the Revised Personality Inventory for Children (PIC-R)<br>2. Depression symptoms, parent-reported child depression via the Revised Personality Inventory | 1. Anxiety: No significant differences between migraine vs. controls and all patients had normal range anxiety scores (STAIC trait mean $35.8 \pm 7.4$ for migraine vs. $33.8 \pm 7.4$ for controls; RCMAS mean $51.6 \pm 8.6$ for migraine vs. $49.2 \pm 12.1$ for controls<br>2. Depression: PIC-R parent-reported depression scores higher in migraine vs. controls* (t=4.74, | N/A | 5/7 domains adequate |

|                                        |              |                |                                                                                                                                                                                                                 |                                                                                        |            |                                    |                                                              |                                                                                                                                                                                                                                                                                                                              |                                                                                                                                                                                                                                                                                                                                   |     |                      |
|----------------------------------------|--------------|----------------|-----------------------------------------------------------------------------------------------------------------------------------------------------------------------------------------------------------------|----------------------------------------------------------------------------------------|------------|------------------------------------|--------------------------------------------------------------|------------------------------------------------------------------------------------------------------------------------------------------------------------------------------------------------------------------------------------------------------------------------------------------------------------------------------|-----------------------------------------------------------------------------------------------------------------------------------------------------------------------------------------------------------------------------------------------------------------------------------------------------------------------------------|-----|----------------------|
|                                        |              |                |                                                                                                                                                                                                                 |                                                                                        |            |                                    |                                                              | for Children (PIC-R)                                                                                                                                                                                                                                                                                                         | p<0.001), but scores in normal range in migraine group                                                                                                                                                                                                                                                                            |     |                      |
| Cunningham S et al, 1987 <sup>24</sup> | Case-control | Ottawa, Canada | Cases recruited from a neurology clinic, pain controls were suffering from chronic musculoskeletal pain and recruited from outpatient clinics, and no pain hospital controls recruited from outpatients clinics | N=60, 20 with migraine, 20 with musculoskeletal pain, and 20 no-pain hospital controls | 9-17 years | N=30 females (50%); 30 males (50%) | Migraine diagnosis by neurologist using unvalidated criteria | 1. Anxiety symptoms measured using State-Trait Anxiety Inventory (STAI) administered to secondary school participants, the "How I Feel Questionnaire" was used for primary school participants, and the Child Behavior Checklist (CBCL) given to parents and teachers<br>2. Depressive symptoms measured using the Birlerson | 1. Anxiety: CBCL teacher-reported mean anxiety scores higher for migraine than for other groups* (61.9 for migraine, 57.4 for pain controls and 57.2 for no pain controls, F(2,48)=4.0, p<0.05); no differences seen on STAI or "How I Feel Scores"<br>2. Depressive symptoms: No significant differences found between groups on | N/A | 3/7 domains adequate |

|                                      |              |                 |                                                                                                                      |                                      |            |                                        |                                                                                |                                                                                                              |                                                                                                                                                                                                                                                                                     |     |                      |
|--------------------------------------|--------------|-----------------|----------------------------------------------------------------------------------------------------------------------|--------------------------------------|------------|----------------------------------------|--------------------------------------------------------------------------------|--------------------------------------------------------------------------------------------------------------|-------------------------------------------------------------------------------------------------------------------------------------------------------------------------------------------------------------------------------------------------------------------------------------|-----|----------------------|
|                                      |              |                 |                                                                                                                      |                                      |            |                                        |                                                                                | Self Rating Scale and the Child Behavior Checklist (CBCL) given to parents and teachers                      | any of the measures (no raw data given)<br>3. Internalizing symptoms (combined): CBCL parent-reported internalizing mean scores higher for migraine than for no pain controls* (63.7 for migraine, 60.4 for pain controls and 53.6 for no pain controls, $F(2,57)=5.4$ , $p<0.01$ ) |     |                      |
| D'Andrea G et al, 1989 <sup>25</sup> | Case-control | Vincenza, Italy | Cases recruited from a headache clinic, controls recruited from hospital personnel (offspring of hospital personnel) | N=40 (20 with migraine, 20 controls) | 7-11 years | N=25 females (62.5%); 15 males (37.5%) | Migraine diagnosis according to Ad Hoc Committee on Classification of Headache | Anxiety symptoms measured using a 48-item anxiety questionnaire developed by Busnelli, Faina, and Dall'Aglio | Anxiety symptoms were higher in the migraine group ( $52.7 \pm 26$ ) vs. controls* ( $31.8 \pm 19.4$ ) ( $p<0.01$ )                                                                                                                                                                 | N/A | 5/7 domains adequate |

|                                        |                 |              |                                                                                                               |                                             |                                |                                                                                          |                                                        |                                                                                                                                                                                                                                                                                  |                                                                                                                                                                    |     |                       |
|----------------------------------------|-----------------|--------------|---------------------------------------------------------------------------------------------------------------|---------------------------------------------|--------------------------------|------------------------------------------------------------------------------------------|--------------------------------------------------------|----------------------------------------------------------------------------------------------------------------------------------------------------------------------------------------------------------------------------------------------------------------------------------|--------------------------------------------------------------------------------------------------------------------------------------------------------------------|-----|-----------------------|
| Donnelly T et al, 2017 <sup>26</sup>   | Cross-sectional | Australia    | Cases and controls recruited from a twin study (Australian Twin Registry) which is a community-based registry | N=2,525 (149 with migraine, 2,376 controls) | 3-18 years                     | N=1,290 females (51%), 1,235 males (49%)                                                 | Migraine diagnosis according to ICHD-II beta criteria  | Anxious-depressed syndrome measured using the Achenbach System of Empirically Based Assessment (ASEBA) Child Behavior Checklist (CBCL) for 3-5yo, and the CBCL for 6-18 yo, where 98 <sup>th</sup> %ile score was used as clinical cut-off to define clinical anxiety/depression | The odds of clinical anxious/depressed syndrome were higher among those with migraine vs. controls* (OR=6.52, 95% CI=3.15-13.5, p<0.001)                           | N/A | 7/10 domains adequate |
| El-Heneedy Y et al, 2019 <sup>27</sup> | Case-control    | Tanta, Egypt | Cases recruited from headache clinic; not reported where controls were recruited from                         | N=60 (40 with migraine, 20 controls)        | 11.13 ± 2.85 (range not given) | Not described for whole sample; for migraine group: 23 females (57.5%); 17 males (42.5%) | Migraine diagnosis according to ICHD-III beta criteria | Internalizing symptoms measured using the Child Behavior Checklist (CBCL)                                                                                                                                                                                                        | Higher anxious/depressed CBCL scores in migraine vs. control group* (67.18 ±4.67 vs. 58.7 ±4.38, t=16.985, p=0.001), and higher withdrawn/depressed CBCL scores in | N/A | 5/7 domains adequate  |

|                                   |              |                  |                                                                                                                                                            |                                                     |            |                                          |                                                                |                                                                                                                                                                        |                                                                                                                                                                                                                                                                                                                          |     |                      |
|-----------------------------------|--------------|------------------|------------------------------------------------------------------------------------------------------------------------------------------------------------|-----------------------------------------------------|------------|------------------------------------------|----------------------------------------------------------------|------------------------------------------------------------------------------------------------------------------------------------------------------------------------|--------------------------------------------------------------------------------------------------------------------------------------------------------------------------------------------------------------------------------------------------------------------------------------------------------------------------|-----|----------------------|
|                                   |              |                  |                                                                                                                                                            |                                                     |            |                                          |                                                                |                                                                                                                                                                        | migraine vs. control group* (65.7 ±9.73 vs. 58.6 ±5.63, t=9.072, p=0.004)                                                                                                                                                                                                                                                |     |                      |
| Ertem D et al, 2019 <sup>28</sup> | Case-control | Istanbul, Turkey | Cases recruited from a headache clinic, and hospital controls recruited (patients without neurological disorder diagnosed with any other health condition) | N=238 (115 with migraine, 80 with TTH, 43 controls) | 6-16 years | N=130 females (54.6%); 108 males (45.4%) | Primary headache diagnosis according to ICHD-III beta criteria | 1. Anxiety symptoms measured using the Social Anxiety Scale for Adolescents (SAS-A)<br>2. Depression symptoms measured using the Children's Depression Inventory (CDI) | 1. Anxiety: SAS-A scores did not differ between groups (40.2 ± 12.3 for episodic migraine, 41.6 ± 11.8 for chronic migraine, 38.8 ± 10.5 for TTH, and 40.4 ± 12.0 for controls, p=0.712)<br>2. Depression : CDI scores did not differ between groups (12.8 ± 7.7 for episodic migraine, 14.7 ± 8.7 for chronic migraine, | N/A | 2/7 domains adequate |

|                                   |                             |                        |                                                                                                                                                                 |                                                                                                             |             |                                              |                                                          |                                                                         |                                                                                                                                                                                                                                     |     |                       |
|-----------------------------------|-----------------------------|------------------------|-----------------------------------------------------------------------------------------------------------------------------------------------------------------|-------------------------------------------------------------------------------------------------------------|-------------|----------------------------------------------|----------------------------------------------------------|-------------------------------------------------------------------------|-------------------------------------------------------------------------------------------------------------------------------------------------------------------------------------------------------------------------------------|-----|-----------------------|
|                                   |                             |                        |                                                                                                                                                                 |                                                                                                             |             |                                              |                                                          |                                                                         | 12.8 ± 6.7 for TTH, and 12.5 ± 5.8 for controls)                                                                                                                                                                                    |     |                       |
| Fuh JL et al, 2009 <sup>29</sup>  | Cross-sectional             | Taitung County, Taiwan | Recruited from community (school-based recruitment)                                                                                                             | N=3,963 (928 with migraine or probable migraine, 1,092 with TTH, 445 with other headache, 1498 no headache) | 13-15 years | N=1,923 females (48.5%); 2,040 males (51.5%) | Primary headache diagnosis according to ICHD-II criteria | Depression: Ascertained using the Adolescent Depression Inventory (ADI) | Migraine group (13.4 ± 6.90 had higher ADI scores than controls (6.7 ± 5.8) and than TTH (8.7 ± 6.0, p<0.001)*                                                                                                                      | N/A | 9/10 domains adequate |
| Galli F et al, 2007 <sup>30</sup> | Case-control                | Rome, Italy            | Cases recruited from headache clinic, recurrent abdominal pain controls recruited from gastroenterology department, and healthy controls recruited from schools | N=210 (42 with migraine, 28 with TTH, 70 with recurrent abdominal pain, and 70 controls)                    | 4-18 years  | N=111 females (52.9%), 99 males (47.1%)      | Primary headache diagnosis according to ICHD-II criteria | Child Behavior Checklist (CBCL)                                         | Mean internalizing score was higher for migraine group (12.52 ± 6.89) vs. for controls (8.27 ± 5.39), p<0.05*; mean anxiety/depression score was not different for migraine group (5.02 ± 3.47) vs. for control group (4.58 ± 3.33) | N/A | 6/7 domains adequate  |
| Gibson J 2004 <sup>31</sup>       | Case-control (dissertation) | Columbus, USA          | Cases recruited from headache                                                                                                                                   | N=120 (68 with migraine, 40 controls)                                                                       | 6-12 years  | N= 51 females (47%); 57                      | Primary headache diagnosis according                     | 1. Anxiety: measured using the Revised                                  | 1. Anxiety: RCMAS anxiety scores                                                                                                                                                                                                    | N/A | 4/7 domains           |

|  |  |  |                                                               |  |  |             |                  |                                                                                                                                                                                                                                                                                                                                                                                                                         |                                                                                                                                                                                                                                                                                                                                                                                                                                                                                      |  |          |
|--|--|--|---------------------------------------------------------------|--|--|-------------|------------------|-------------------------------------------------------------------------------------------------------------------------------------------------------------------------------------------------------------------------------------------------------------------------------------------------------------------------------------------------------------------------------------------------------------------------|--------------------------------------------------------------------------------------------------------------------------------------------------------------------------------------------------------------------------------------------------------------------------------------------------------------------------------------------------------------------------------------------------------------------------------------------------------------------------------------|--|----------|
|  |  |  | clinic, controls recruited from pediatric clinic or community |  |  | males (53%) | to ICHD criteria | <p>Children's Manifest Anxiety Scale (RCMAS), and the Child Symptom Inventory-4 (CSI-4)</p> <p>2. Depression: measured using the Children's Depression Inventory, and the Child Symptom Inventory-4 (CSI-4)</p> <p>NB. Those with screening cut-offs or with past psychiatric diagnosis had a follow-up semi-structured interview with parents using DSM-IV diagnostic criteria (Barkley &amp; Murphy, 1998 method)</p> | <p>were higher for migraine* (<math>48.23 \pm 13.59</math> vs. <math>38.78 \pm 10.52</math>, <math>t(102) = -3.75</math>, <math>p &lt; 0.001</math>); semi-structured interviews revealed migraine group more likely to have generalized anxiety disorder* (<math>OR = 6.7</math>, 95% CI not given, <math>\chi^2 = 4.10</math>, <math>p &lt; 0.05</math>)</p> <p>2. Depression: CSI-4 scores in normal range for migraine, TTH and controls; Higher CSI-4 depression scores for</p> |  | adequate |
|--|--|--|---------------------------------------------------------------|--|--|-------------|------------------|-------------------------------------------------------------------------------------------------------------------------------------------------------------------------------------------------------------------------------------------------------------------------------------------------------------------------------------------------------------------------------------------------------------------------|--------------------------------------------------------------------------------------------------------------------------------------------------------------------------------------------------------------------------------------------------------------------------------------------------------------------------------------------------------------------------------------------------------------------------------------------------------------------------------------|--|----------|

|  |  |  |  |  |  |  |  |  |                                                                                                                                                                                                                                                                                                                                                                                       |  |  |
|--|--|--|--|--|--|--|--|--|---------------------------------------------------------------------------------------------------------------------------------------------------------------------------------------------------------------------------------------------------------------------------------------------------------------------------------------------------------------------------------------|--|--|
|  |  |  |  |  |  |  |  |  | <p>migraine vs. controls* (53.26 ± 6.95 for migraine vs. 50.85 ± 2.82 for controls, t(106)=-2.09, p&lt;0.05) and higher dysthymia scores for migraine vs. controls* (57.32 ± 9.75 for migraine vs. 53.10 ± 5.14 for controls, (t(106)=-2.54, p&lt;0.05); CDI scores in normal range for migraine, mean CDI scores higher for migraine* (43.4 ± 7.74 vs. 40.39 ± 5.7, t(91)=-2.02,</p> |  |  |
|--|--|--|--|--|--|--|--|--|---------------------------------------------------------------------------------------------------------------------------------------------------------------------------------------------------------------------------------------------------------------------------------------------------------------------------------------------------------------------------------------|--|--|



|                                             |                 |                          |                                                                |                                                                                                                    |            |                                        |                                                              |                                                                                                                      |                                                                                                                                                                                                 |                                                                                                            |                       |  |
|---------------------------------------------|-----------------|--------------------------|----------------------------------------------------------------|--------------------------------------------------------------------------------------------------------------------|------------|----------------------------------------|--------------------------------------------------------------|----------------------------------------------------------------------------------------------------------------------|-------------------------------------------------------------------------------------------------------------------------------------------------------------------------------------------------|------------------------------------------------------------------------------------------------------------|-----------------------|--|
|                                             |                 |                          |                                                                |                                                                                                                    |            |                                        |                                                              |                                                                                                                      |                                                                                                                                                                                                 | p<0.05);<br>no data<br>reported<br>on<br>depressive<br>disorders<br>from semi-<br>structured<br>interviews |                       |  |
| Gladstein J et al, 1996 <sup>32</sup>       | Cross-sectional | Baltimore, United States | Cases of chronic daily headache recruited from headache clinic | N=37 (5 with chronic/trans formed migraine, 13 with new daily persistent headache, 15 with other/comorbid pattern) | 7-17 years | N=29 females (78%); 8 males (22%)      | Primary headache diagnosis as per Silberstein et al criteria | Child Behavior Checklist (CBCL)                                                                                      | Internalizing scale scores on CBCL were no different across the chronic daily headache groups (migraine = 58.2 ± 7.3; new daily persistent headache = 56.9 ± 8.6; other/comorbid = 54.7 ± 10.2) | N/A                                                                                                        | 4/10 domains adequate |  |
| Gozubatik-Celik R et al, 2021 <sup>33</sup> | Case-control    | Istanbul, Turkey         | Recruitment from neurology clinic                              | N=92 (N=29 with migraine, N=32 with TTH, N=31 controls)                                                            | 8-18 years | N=55 females (59.8%); 37 males (40.2%) | Primary headache diagnosis according to ICHD III criteria    | 1. Anxiety symptoms measured using the Screen for Child Anxiety-Related Disorders (SCARED)<br>2. Depression symptoms | 1. The mean SCARED score was higher in the migraine vs. control group* (32.0±3.1 vs. 8.0±1.3, p=0.001)<br>2. The mean CDI score                                                                 | N/A                                                                                                        | 6/7 domains adequate  |  |

|                                      |              |             |                                                                                   |                                       |            |                                    |                                                           |                                                                                                                                                                                                                             |                                                                                                                                                                                                  |     |                      |
|--------------------------------------|--------------|-------------|-----------------------------------------------------------------------------------|---------------------------------------|------------|------------------------------------|-----------------------------------------------------------|-----------------------------------------------------------------------------------------------------------------------------------------------------------------------------------------------------------------------------|--------------------------------------------------------------------------------------------------------------------------------------------------------------------------------------------------|-----|----------------------|
|                                      |              |             |                                                                                   |                                       |            |                                    |                                                           | measured using the Children's Depression Inventory (CDI)                                                                                                                                                                    | was higher in the migraine vs. control group* (22.0±2.7 vs. 10.0±4.0, p=0.002)                                                                                                                   |     |                      |
| Guidetti V et al, 1987 <sup>35</sup> | Case-control | Rome, Italy | Cases recruited from headache clinic, controls recruited from community (schools) | N=86 (43 with migraine, 43 controls)  | 8-14 years | Not reported                       | Migraine diagnosis according to Ad Hoc Committee criteria | Personality Inventory for Children (PIC) administered to mothers                                                                                                                                                            | Migraine group had significantly higher scores on the depression subscale* (p<0.01) and the anxiety subscale* (p<0.01)                                                                           | N/A | 3/7 domains adequate |
| Guidetti V et al, 1998 <sup>36</sup> | Cohort       | Rome, Italy | Cases randomly selected from a clinical cohort in a headache clinic               | N=100 (64 with migraine, 36 with TTH) | 4-18 years | N=60 females (60%); 40 males (40%) | Primary headache diagnosis according to ICHD criteria     | Psychologists performed structured clinical interviews using DSM-II-R criteria; anxiety was also measured using the Anxiety symptoms measured using State-Trait Anxiety Inventory for Children (STAIC), and parent-reported | 1. Anxiety disorders: For baseline (1998), 15.6% of migraine vs. 2.8% of TTH group; anxiety disorders were significantly associated with migraine* (chi square=3.88, df=1, p<0.05); at follow-up | N/A | 5/8 domains adequate |

|                                      |                         |             |                                                      |                                                                                        |            |                                         |                                                         |                                                                                                            |                                                                                                                                                                                                                                                                                                                                        |     |                      |
|--------------------------------------|-------------------------|-------------|------------------------------------------------------|----------------------------------------------------------------------------------------|------------|-----------------------------------------|---------------------------------------------------------|------------------------------------------------------------------------------------------------------------|----------------------------------------------------------------------------------------------------------------------------------------------------------------------------------------------------------------------------------------------------------------------------------------------------------------------------------------|-----|----------------------|
|                                      |                         |             |                                                      |                                                                                        |            |                                         |                                                         | anxiety and depression were measured using the Revised Personality Inventory for Children (PIC-R)          | (1996), 81.8% of migraine vs. 10% of TTH had anxiety disorders<br>2. Depression: Did not report group results for baseline (1988); At 8-year follow-up (1996) 54.5% with migraine vs. 9.7% with TTH had depression<br>3. Anxiety and depression: At 8-year follow-up 45.5% of migraine vs. 3.2% of TTH had both anxiety and depression |     |                      |
| Guidetti V et al, 2013 <sup>37</sup> | Case-control (abstract) | Rome, Italy | Unclear where cases and controls were recruited from | N=200 (60 with migraine without aura, 10 with migraine with aura, 15 with TTH, 10 with | 8-14 years | N=101 females (50.5%), 99 males (49.5%) | Unclear how primary headache diagnoses were ascertained | Anxiety and depression measured with the Self Administered Psychiatric Scales for Children and Adolescents | No differences in anxiety or depression subscales between groups, except for depressed mood scale, for which                                                                                                                                                                                                                           | N/A | 2/7 domains adequate |

|                                     |                         |           |                                            |                                                                                 |             |                                        |                                                              |                                                                                                                                                                                     |                                                                                                                                                                                                                                                                                     |     |                       |
|-------------------------------------|-------------------------|-----------|--------------------------------------------|---------------------------------------------------------------------------------|-------------|----------------------------------------|--------------------------------------------------------------|-------------------------------------------------------------------------------------------------------------------------------------------------------------------------------------|-------------------------------------------------------------------------------------------------------------------------------------------------------------------------------------------------------------------------------------------------------------------------------------|-----|-----------------------|
|                                     |                         |           |                                            | chronic daily headache and 5 with benign paroxysmal vertigo, plus 100 controls) |             |                                        |                                                              | (SAFA) Anxiety (A) and Depression (D) scales, respectively                                                                                                                          | higher scores were observed in the migraine with aura group* (p=0.024)                                                                                                                                                                                                              |     |                       |
| Guler G et al, 2017 <sup>38</sup>   | Cross-sectional         | Turkey    | Unclear                                    | N=140 (98 with migraine, 42 with TTH)                                           | 12-18 years | N=91 females (65.0%); 59 males (42.1%) | Primary headache diagnosis according to ICHD-3 beta criteria | Psychiatric disorders ascertained using DSM-IV criteria, depression and anxiety ascertained using “Depression Scale” and the “State-Trait Anxiety Scale for Children”, respectively | No difference between migraine and TTH in depression and anxiety prevalence, but rates high:<br>1. Depression : 27.6% of migraine group vs. 21.4% of TTH group had depression (p=0.57)<br>2. Anxiety: 30.6% of migraine group vs. 38.1% of TTH group had anxiety disorders (p=0.50) | N/A | 3/10 domains adequate |
| Gunalan S et al, 2012 <sup>39</sup> | Case-control (abstract) | Australia | Case-control twin study (community sample) | N=455 (did not report number of cases vs. controls)                             | 3-18 years  | Not reported                           | Not reported                                                 | ASEBA Behavioral Checklists                                                                                                                                                         | Migraine twins had higher anxious depression scores than control twins*                                                                                                                                                                                                             | N/A | 4/7 domains adequate  |

|                                      |                 |                                |                  |                                                     |             |                                              |                                                                                                                       |                                                                                            |                                                                                                                                                                                                       |     |                       |
|--------------------------------------|-----------------|--------------------------------|------------------|-----------------------------------------------------|-------------|----------------------------------------------|-----------------------------------------------------------------------------------------------------------------------|--------------------------------------------------------------------------------------------|-------------------------------------------------------------------------------------------------------------------------------------------------------------------------------------------------------|-----|-----------------------|
|                                      |                 |                                |                  |                                                     |             |                                              |                                                                                                                       |                                                                                            | NB. Scores reported to be significantly higher in migraine twins but no raw data given                                                                                                                |     |                       |
| Hammond N et al, 2019 <sup>40</sup>  | Cohort          | Canada                         | Population-based | N=2,313 (3.1% with migraine)                        | 14-15 years | N=1,182 females (51.1%); 1,131 males (48.9%) | Migraine ascertained by person most knowledgeable reported health professional diagnosed migraine in their adolescent | Depression and separation anxiety symptoms measured using Ontario Child Health Study scale | Mean depressive/anxiety symptoms score higher for those with migraine (3.53 ± 2.78 in migraine group vs. 2.65 ± 1.99 in other headache group, p=0.016)                                                | N/A | 6/8 domains adequate  |
| Heinrich M et al, 2007 <sup>41</sup> | Cross-sectional | Southern Lower Saxony, Germany | Population-based | N=5,474 (411 with migraine, 5,063 without migraine) | 7-14 years  | N=2,704 females (49.4%); 2,770 males (50.6%) | Primary headache diagnosis according to ICHD criteria                                                                 | Child Behavior Checklist (CBCL) internalizing scores                                       | Headache group had higher mean internalizing symptoms than non-headache group* (1.47 for headache vs. 0.95, F=138.03, df=1,5395, p<0.001); migraine group had higher mean internalizing symptoms than | N/A | 6/10 domains adequate |

|                                    |                 |     |                  |                                                                                                                                         |             |                                              |                                                           |                                                                                                                    |                                                                                                                                                                                                                                                       |     |                       |
|------------------------------------|-----------------|-----|------------------|-----------------------------------------------------------------------------------------------------------------------------------------|-------------|----------------------------------------------|-----------------------------------------------------------|--------------------------------------------------------------------------------------------------------------------|-------------------------------------------------------------------------------------------------------------------------------------------------------------------------------------------------------------------------------------------------------|-----|-----------------------|
|                                    |                 |     |                  |                                                                                                                                         |             |                                              |                                                           |                                                                                                                    | TTH and unclassifiable headache* (1.87 for migraine, 1.57 for unclassifiable headache, 1.16 for TTH, F=28.45, df=2,2867, p<0.001)                                                                                                                     |     |                       |
| Hommer R et al, 2021 <sup>42</sup> | Cross-sectional | USA | Population-based | N=10,123 (N=162 (1.6%) with migraine with aura, N=1,114 (11.0%) with migraine without aura, N=1,448 (14.3%) with non-migraine headache) | 13-18 years | N=5,170 females (51.1%); 4,953 males (48.9%) | Primary headache diagnosis according to ICHD III criteria | Psychiatric diagnoses made according to a modified World Health Organization Composite Diagnostic Interview (CIDI) | 1. Major depressive disorder present in 27.0%±4.9% of migraine with aura, 17.2±1.4% of migraine without aura, and 8.8%±0.6% of controls<br>2. Anxiety disorders present in 47.6%±6.1% of migraine with aura, 29.9%±1.5% of migraine without aura, and | N/A | 8/10 domains adequate |

|                                |              |                         |                                                                                                   |                                      |            |                                         |                                     |                                                                               |                                                                                                                                                                                 |     |                      |
|--------------------------------|--------------|-------------------------|---------------------------------------------------------------------------------------------------|--------------------------------------|------------|-----------------------------------------|-------------------------------------|-------------------------------------------------------------------------------|---------------------------------------------------------------------------------------------------------------------------------------------------------------------------------|-----|----------------------|
|                                |              |                         |                                                                                                   |                                      |            |                                         |                                     |                                                                               | 17.0%±0.6% of controls<br>*Modeling associations are reported but no comparison between migraine vs. controls, only all headache vs. controls or migraine with vs. without aura |     |                      |
| Huss et al, 2008 <sup>43</sup> | Case-control | Kentucky, United States | Cases recruited from neurology clinic or community; controls recruited from hospital or community | N=53 (21 with migraine, 32 controls) | 7-12 years | N= 26 females (49.1%); 27 males (50.9%) | Migraine according to ICHD criteria | Anxiety measured using the Multidimensional Anxiety Scale for Children (MASC) | Mean MASC scores were higher in the migraine group as compared to the control group* (55.9 vs. 50.22, F(1,51)=6.30, p<0.05, d=0.71)                                             | N/A | 4/7 domains adequate |

|                                  |              |                                  |                                                                                       |                                                                              |            |                                         |                                                       |                                                                                                                                                                                                                                                    |                                                                                                                                                                                                                                                                                                                                                           |     |                      |
|----------------------------------|--------------|----------------------------------|---------------------------------------------------------------------------------------|------------------------------------------------------------------------------|------------|-----------------------------------------|-------------------------------------------------------|----------------------------------------------------------------------------------------------------------------------------------------------------------------------------------------------------------------------------------------------------|-----------------------------------------------------------------------------------------------------------------------------------------------------------------------------------------------------------------------------------------------------------------------------------------------------------------------------------------------------------|-----|----------------------|
| Just U et al, 2003 <sup>44</sup> | Case-control | Mannheim and Heidelberg, Germany | Cases recruited from community or neurology clinic; controls recruited from community | N=211 (70 migraine without aura, 33 migraine with aura, 25 TTH, 83 controls) | 6-18 years | N=99 females (46.9%); 112 males (53.1%) | Primary headache diagnosis according to ICHD criteria | 1. Anxiety: measured using the Anxiety Questionnaire for Pupils (AFS) and the Child Behavior Checklist (CBCL)<br>2. Depression: measured using the Depression Inventory for Children and Adolescents (DIK) and the Child Behavior Checklist (CBCL) | 1. Anxiety: no significant differences between groups on the AFS subscales; CBCL anxiety/depression scores higher in migraine with aura* (p=0.002) and migraine without aura *(p<0.001) than controls; CBCL internalizing scores higher in migraine with aura* (p<0.001) and migraine without aura* (p<0.001) than controls<br>2. Depression : DIK scores | N/A | 5/7 domains adequate |
|----------------------------------|--------------|----------------------------------|---------------------------------------------------------------------------------------|------------------------------------------------------------------------------|------------|-----------------------------------------|-------------------------------------------------------|----------------------------------------------------------------------------------------------------------------------------------------------------------------------------------------------------------------------------------------------------|-----------------------------------------------------------------------------------------------------------------------------------------------------------------------------------------------------------------------------------------------------------------------------------------------------------------------------------------------------------|-----|----------------------|



|                                       |                 |             |                                      |                                         |             |                                         |                                                          |                                                                                                                                                                               |                                                                                                                                                      |                           |                       |
|---------------------------------------|-----------------|-------------|--------------------------------------|-----------------------------------------|-------------|-----------------------------------------|----------------------------------------------------------|-------------------------------------------------------------------------------------------------------------------------------------------------------------------------------|------------------------------------------------------------------------------------------------------------------------------------------------------|---------------------------|-----------------------|
|                                       |                 |             |                                      |                                         |             |                                         |                                                          |                                                                                                                                                                               | significantly different between groups* (F=3.41, df=3, p=0.019) but not reported separately for migraine; CBCL scores as per above                   |                           |                       |
| Kaczynski K et al, 2013 <sup>46</sup> | Cross-sectional | Boston, USA | Cases recruited from headache clinic | N=262 (109 with migraine, 153 with TTH) | 11-17 years | N=179 females (68.5%); 83 males (31.7%) | Primary headache diagnosis according to ICHD-II criteria | <ol style="list-style-type: none"> <li>1. Anxiety: measured using the Revised Children's Manifest Anxiety Scale (RCMAS)</li> <li>2. Depression: measured using the</li> </ol> | <ol style="list-style-type: none"> <li>1. Anxiety: Migraine group mean RCMAS score (11.23 ±8.12) did not differ from TTH group mean score</li> </ol> | See Table 2 in manuscript | 6/10 domains adequate |

|                                    |                 |                |                                                                                                                                                                                   |                |            |                                          |                                                                                                                         |                                                                                                                                     |                                                                                                                                                                           |     |                       |
|------------------------------------|-----------------|----------------|-----------------------------------------------------------------------------------------------------------------------------------------------------------------------------------|----------------|------------|------------------------------------------|-------------------------------------------------------------------------------------------------------------------------|-------------------------------------------------------------------------------------------------------------------------------------|---------------------------------------------------------------------------------------------------------------------------------------------------------------------------|-----|-----------------------|
|                                    |                 |                |                                                                                                                                                                                   |                |            |                                          |                                                                                                                         | Children's Depression Inventory (CDI)                                                                                               | (12.39 ±8.58)<br>2. Migraine group had lower mean CDI score (8.52 ±7.26) as compared to TTH group (10.32 ±7.93) (t(289)= -2.57, p<0.05, d=0.30)                           |     |                       |
| Kafle M et al, 2022 <sup>47</sup>  | Cross-sectional | USA            | Cases of migraine who were hospitalized in different centers for migraine management identified in an administrative health database (Pediatric Health Information System – PHIS) | N=21,436       | 6-18 years | N=15,419 females (72%), 6,017 males 28%) | Migraine diagnosis according to International Classification of Diseases, 9 <sup>th</sup> and 10 <sup>th</sup> editions | Psychiatric diagnoses ascertained using the International Classification of Diseases, 9 <sup>th</sup> and 10 <sup>th</sup> editions | 1. Anxiety disorder: 11.2 % (2,415) of the migraine cases had an anxiety disorder<br>2. Depressive disorder: 6.7% (1,433) of the migraine cases had a depressive disorder | N/A | 8/10 domains adequate |
| Kandemir et al, 2018 <sup>48</sup> | Case-control    | Ankara, Turkey | Case recruited from                                                                                                                                                               | N=100 (50 with | 8-18 years | N=73 females (73.0%);                    | Migraine diagnosis according                                                                                            | 1. Anxiety: Measured using the                                                                                                      | 1. Anxiety: Migraine group had                                                                                                                                            | N/A | 6/7 domains           |

|  |  |  |                                                                                    |                        |  |                  |                           |                                                                                                                                                                                                                                                                                                      |                                                                                                                                                                                                                                                                                                                                                                                      |          |
|--|--|--|------------------------------------------------------------------------------------|------------------------|--|------------------|---------------------------|------------------------------------------------------------------------------------------------------------------------------------------------------------------------------------------------------------------------------------------------------------------------------------------------------|--------------------------------------------------------------------------------------------------------------------------------------------------------------------------------------------------------------------------------------------------------------------------------------------------------------------------------------------------------------------------------------|----------|
|  |  |  | neurology clinic; controls were hospital controls recruited from pediatric clinics | migraine, 50 controls) |  | 27 males (27.0%) | to ICHD-III beta criteria | Screen for Child Anxiety Related Emotional Disorders (SCARED) and the Kiddie Schedule for Affective Disorders and Schizophrenia for School-Age Children – Present and Lifetime Version (Kiddie SADS)<br>2. Depression: Measured using the Children's Depression Inventory (CDI), and the Kiddie SADS | higher prevalence of Kiddie SADS anxiety disorders vs. controls* (44% vs. 18%, $\chi^2=6.857$ , $p=0.009$ ); no difference between the groups in the mean SCARED scores (28.84 $\pm$ 13.49 for migraine vs. 28.08 $\pm$ 14.67 for controls, $t=0.270$ , $p=0.78$ )<br>2. Depression: Migraine group had higher prevalence of Kiddie SADS depressive disorders vs. controls* (18% vs. | adequate |
|--|--|--|------------------------------------------------------------------------------------|------------------------|--|------------------|---------------------------|------------------------------------------------------------------------------------------------------------------------------------------------------------------------------------------------------------------------------------------------------------------------------------------------------|--------------------------------------------------------------------------------------------------------------------------------------------------------------------------------------------------------------------------------------------------------------------------------------------------------------------------------------------------------------------------------------|----------|

|                                                     |                     |     |                                                                                                                                          |                                                                                      |                |                                                    |                                                                          |                                                                                                                                                                                                                                              |                                                                                                                                                                                                |                                                                                                                                                                                                                                         |                                     |
|-----------------------------------------------------|---------------------|-----|------------------------------------------------------------------------------------------------------------------------------------------|--------------------------------------------------------------------------------------|----------------|----------------------------------------------------|--------------------------------------------------------------------------|----------------------------------------------------------------------------------------------------------------------------------------------------------------------------------------------------------------------------------------------|------------------------------------------------------------------------------------------------------------------------------------------------------------------------------------------------|-----------------------------------------------------------------------------------------------------------------------------------------------------------------------------------------------------------------------------------------|-------------------------------------|
|                                                     |                     |     |                                                                                                                                          |                                                                                      |                |                                                    |                                                                          |                                                                                                                                                                                                                                              | 4%,<br>p=0.025);<br>no<br>difference<br>between<br>the groups<br>in the<br>mean CDI<br>scores<br>(13.02<br>±9.12 for<br>migraine<br>vs. 11.68<br>±7.14 for<br>controls,<br>t=0.817,<br>p=0.41) |                                                                                                                                                                                                                                         |                                     |
| Kashikar<br>-Zuck S<br>et al,<br>2013 <sup>49</sup> | Cross-<br>sectional | USA | Cases<br>recruited<br>from<br>headache<br>clinic;<br>juvenile<br>fibromyalg<br>ia group<br>recruited<br>from<br>rheumatol<br>ogy clinics | N=304 (153<br>with chronic<br>migraine;<br>151 with<br>juvenile<br>fibromyalgia<br>) | 10-18<br>years | N=261<br>females<br>85.9%); 43<br>males<br>(14.1%) | Chronic<br>migraine<br>diagnosis<br>according<br>to ICHD-<br>II criteria | 1. Anxiety:<br>measured<br>using the<br>Adolescen<br>t<br>Symptom<br>Inventory-<br>4 –<br>Generaliz<br>ed<br>Anxiety<br>Subscale<br>(ASI-4)<br>2. Depressio<br>n:<br>measured<br>using<br>Children’s<br>Depressio<br>n<br>Inventory<br>(CDI) | N/A                                                                                                                                                                                            | 1. Anxiety:<br>Mean<br>ASI-4<br>scores<br>lower in<br>the<br>chronic<br>migrain<br>e group<br>vs.<br>juvenile<br>fibromy<br>algia<br>group,<br>controlli<br>ng for<br>age and<br>sex<br>(1.03<br>±0.15<br>vs. 2.46<br>±0.15,<br>F=45.18 | 6/10<br>doma<br>ins<br>adequ<br>ate |

|                                          |                          |                 |                                         |                        |                |                 |                                                               |                                                                                                                    |                                                                                                                                  |                                                                                                                                                                                                                                                                                                                                        |                                    |
|------------------------------------------|--------------------------|-----------------|-----------------------------------------|------------------------|----------------|-----------------|---------------------------------------------------------------|--------------------------------------------------------------------------------------------------------------------|----------------------------------------------------------------------------------------------------------------------------------|----------------------------------------------------------------------------------------------------------------------------------------------------------------------------------------------------------------------------------------------------------------------------------------------------------------------------------------|------------------------------------|
|                                          |                          |                 |                                         |                        |                |                 |                                                               |                                                                                                                    |                                                                                                                                  | <p>),<br/>p&lt;0.001<br/>)<br/>2. Depressi<br/>on:<br/>Mean<br/>CDI<br/>scores<br/>lower in<br/>the<br/>chronic<br/>migrain<br/>e group<br/>vs.<br/>juvenile<br/>fibromy<br/>algia<br/>group,<br/>controlli<br/>ng for<br/>age and<br/>sex<br/>(7.98<br/>±0.54<br/>vs.<br/>12.92<br/>±0.55,<br/>F=40.36<br/>,<br/>p&lt;0.001<br/>)</p> |                                    |
| Kroner J<br>et al,<br>2013 <sup>50</sup> | Cohort<br>(abstract<br>) | Cincinnati, USA | Recruited<br>from<br>headache<br>clinic | N=115 with<br>migraine | 11-18<br>years | Not<br>reported | Migraine<br>diagnosis<br>according<br>to ICHD-<br>II criteria | Internalizing<br>symptoms<br>measured<br>using the<br>Behavior<br>Assessment<br>Scale for<br>Children<br>(BASC-II) | Baseline:<br>BASC-II<br>internalizing<br>symptoms<br>score elevated<br>at baseline*<br>(M=60.86, at-<br>risk range,<br>p<0.0001) | N/A                                                                                                                                                                                                                                                                                                                                    | 4/8<br>doma<br>ins<br>adequ<br>ate |

|                                           |                 |                                |                  |                                                                                                                         |             |                                              |                                                           |                                                                                                                                     |                                                                                                                                                                                                                                                                |                                                                                                                                                            |                       |
|-------------------------------------------|-----------------|--------------------------------|------------------|-------------------------------------------------------------------------------------------------------------------------|-------------|----------------------------------------------|-----------------------------------------------------------|-------------------------------------------------------------------------------------------------------------------------------------|----------------------------------------------------------------------------------------------------------------------------------------------------------------------------------------------------------------------------------------------------------------|------------------------------------------------------------------------------------------------------------------------------------------------------------|-----------------------|
| Kröner-Herwig B et al, 2012 <sup>51</sup> | Cross-sectional | Southern Lower Saxony, Germany | Population-based | N=3,399 (N=314 with migraine, N=1,010 with TTH; N=808 with unclassified headache and 1,267 with no headache)            | 9-15 years  | N=1,725 females (50.7%); 1,674 males (49.2%) | Primary headache diagnosis according to ICHD-II criteria  | Internalizing symptoms were measured with the Youth Self-Report (YSR)                                                               | Mean YSR internalizing score was significantly higher comparing the headache groups and the controls (migraine group 1.93 ±0.60, no headache group 1.50 ±0.45, F=89.30, p<0.01 across)                                                                         | The odds of migraine were significantly higher with higher YSR internalizing scores, after controlling for age and sex (OR=4.05, 95% CI=3.13-5.23, p<0.01) | 8/10 domains adequate |
| Lateef T et al, 2019 <sup>52</sup>        | Cross-sectional | USA                            | Population-based | N=10,123 (104 with migraine with aura, 578 with migraine without aura, 586 with other headache, 8,855 with no headache) | 13-18 years | N=5,170 females (51.1%); 4,953 males (48.9%) | Primary headache diagnosis according to ICHD-III criteria | Modified World Health Organization Composite International Diagnostic Interview (CIDI version 3.0) administered by lay interviewers | Migraine was more prevalent in youth who had a diagnosis of a mood or anxiety disorder in the past 12 months: Wald chi square for mood disorder=9.1, df=3, p<0.001*; Wald chi square for anxiety disorder=16.1, df=3, p<0.001* (see Table 1 in publication for | N/A                                                                                                                                                        | 6/10 domains adequate |

|                                       |                 |                 |                                       |                                                    |            |                                        |                                                          |                                                                                                                                                 |                                                                                                                                                                                                                                        |     |                       |
|---------------------------------------|-----------------|-----------------|---------------------------------------|----------------------------------------------------|------------|----------------------------------------|----------------------------------------------------------|-------------------------------------------------------------------------------------------------------------------------------------------------|----------------------------------------------------------------------------------------------------------------------------------------------------------------------------------------------------------------------------------------|-----|-----------------------|
|                                       |                 |                 |                                       |                                                    |            |                                        |                                                          |                                                                                                                                                 | raw data details)                                                                                                                                                                                                                      |     |                       |
| Laurell K et al, 2005 <sup>53</sup>   | Cross-sectional | Uppsala, Sweden | Population-based                      | N=130 (42 with migraine, 37 with TTH, 49 controls) | 7-17 years | N=70 females (53.8%); 60 males (46.2%) | Primary headache diagnosis according to ICHD criteria    | The Child Behavior Checklist (CBCL) was used to measure internalizing symptoms                                                                  | Migraine group had higher mean CBCL internalizing scores than TTH and controls* (4.2 ±4.0 vs. 2.2 ±2.2 vs. 3.3 ±2.9, F(4,115)=2.39, p=0.05); CBCL anxious-depressed subscale scores did not differ between groups (raw data not given) | N/A | 6/10 domains adequate |
| Lucarelli E et al, 2009 <sup>54</sup> | Cross-sectional | Bari, Italy     | Cases recruited from neurology clinic | N=52 (29 with migraine, 23 with TTH)               | 5-16 years | N=31 females (60%); 21 males (40%)     | Primary headache diagnosis according to ICHD-II criteria | 1. Anxiety: measured using the Screen for Child Anxiety Related Disorders (SCARED), the Youth Self Report, the Child Behavior Checklist (CBCL), | 1. Anxiety: 14% of migraine group had anxiety disorders, 24% of migraine group had “anxious-depressive” temperament; 43.5% of TTH group had anxiety                                                                                    | N/A | 3/10 domains adequate |

|  |  |  |  |  |  |  |  |                                                                                                                                                                                                                                                                                               |                                                                                                                                                                                                                                                                                                                                                        |  |  |
|--|--|--|--|--|--|--|--|-----------------------------------------------------------------------------------------------------------------------------------------------------------------------------------------------------------------------------------------------------------------------------------------------|--------------------------------------------------------------------------------------------------------------------------------------------------------------------------------------------------------------------------------------------------------------------------------------------------------------------------------------------------------|--|--|
|  |  |  |  |  |  |  |  | <p>and the Kiddie Schedule for Affective Disorders and Schizophrenia Present and Lifetime Version (Kiddie SADS)</p> <p>2. Depressive symptoms : measured using the Children's Depression Inventory (CDI), the Youth Self Report, the Child Behavior Checklist (CBCL), and the Kiddie SADS</p> | <p>disorders, and 26% of TTH had "anxious-depressive" temperament</p> <p>2. Depression : No patients in migraine group had depressive disorders, 24% of migraine group had "anxious-depressive" temperament, 8.7% of TTH group had depressive disorders, and 26% of TTH had "anxious-depressive" temperament</p> <p>NB. No hypothesis testing done</p> |  |  |
|--|--|--|--|--|--|--|--|-----------------------------------------------------------------------------------------------------------------------------------------------------------------------------------------------------------------------------------------------------------------------------------------------|--------------------------------------------------------------------------------------------------------------------------------------------------------------------------------------------------------------------------------------------------------------------------------------------------------------------------------------------------------|--|--|



|                                            |              |                     |                                                                                                                                                                                          |                                                                                       |            |                        |                                                          |                                                                                                                                                                               |                                                                                                                                                                                                                                                                                                                                                                                                                                                           |     |                      |
|--------------------------------------------|--------------|---------------------|------------------------------------------------------------------------------------------------------------------------------------------------------------------------------------------|---------------------------------------------------------------------------------------|------------|------------------------|----------------------------------------------------------|-------------------------------------------------------------------------------------------------------------------------------------------------------------------------------|-----------------------------------------------------------------------------------------------------------------------------------------------------------------------------------------------------------------------------------------------------------------------------------------------------------------------------------------------------------------------------------------------------------------------------------------------------------|-----|----------------------|
|                                            |              |                     |                                                                                                                                                                                          |                                                                                       |            |                        |                                                          |                                                                                                                                                                               | for group comparisons                                                                                                                                                                                                                                                                                                                                                                                                                                     |     |                      |
| Machnes-Maayan D et al, 2014 <sup>55</sup> | Case-control | Petah Tikva, Israel | Cases recruited from a headache clinic or gastroenterology clinic, hospital controls recruited from general outpatient clinics (recent discharges from hospital for brief acute illness) | N=116 (N=32 migraine, 32 with TTH, 19 with recurrent abdominal pain, and 33 controls) | 5-17 years | N=72 females, 44 males | Primary headache diagnosis according to ICHD-II criteria | Development and Well-Being Assessment (DAWBA) semi-structured interview to diagnose psychiatric disorders, administered by trained non-clinical interviewers, based on DSM-IV | <ol style="list-style-type: none"> <li>1. Depressive disorders on DAWBA: 4 (12.5%) in the migraine group vs. 0 (0%) in the control group vs. 8 (25%) in the TTH group</li> <li>2. Anxiety disorders on DAWBA: 18 (56.3%) in the migraine group vs. 3 (9.1%) in the control group vs. 22 (68.8%) in the TTH group</li> </ol> <p>NB. Overall there were group differences but too small to analyze for migraine vs. controls specifically (analyzed for</p> | N/A | 4/7 domains adequate |

|                                     |                            |                   |                                                                          |                                              |             |                                      |                                                          |                                                                                                                                         |                                                                                                                            |     |                       |
|-------------------------------------|----------------------------|-------------------|--------------------------------------------------------------------------|----------------------------------------------|-------------|--------------------------------------|----------------------------------------------------------|-----------------------------------------------------------------------------------------------------------------------------------------|----------------------------------------------------------------------------------------------------------------------------|-----|-----------------------|
|                                     |                            |                   |                                                                          |                                              |             |                                      |                                                          |                                                                                                                                         | all pain groups vs. controls)<br>NB2. Specific DAWBA diagnosis rates in manuscript Table 2                                 |     |                       |
| Maleki N, 2016 <sup>57</sup>        | Cross-sectional (abstract) | Boston, USA       | Cases recruited from hospital clinic (not specified what type of clinic) | N=1,425 with migraine                        | 10-15 years | N=1,425 females (100%); 0 males (0%) | Not reported                                             | Not reported in detail; chart reviews were carried out to identify prevalence of other diseases in this sample of females with migraine | Anxiety occurred in 13% of this sample; depression prevalence is not reported but is stated to be uncommon in this sample  | N/A | 0/10 domains adequate |
| Mar S et al, 2009 <sup>58</sup>     | Case-control (abstract)    | St Louis, MO, USA | Unclear                                                                  | N=17 (10 with chronic migraine, 7 controls)  | 12-17 years | Not reported                         | Chronic migraine diagnosis according to ICHD-II criteria | Depression ascertained using Children's Depression Inventory (CDI)                                                                      | CDI scores were higher in the chronic migraine group compared to the controls* (54 vs. 47; no hypothesis testing reported) | N/A | 3/7 domains adequate  |
| Mar S et al, 2010 <sup>59</sup>     | Case-control (abstract)    | Not reported      | Not reported                                                             | N=40 (23 with chronic migraine, 17 controls) | 12-17 years | Not reported                         | Not reported                                             | Not reported, labeled as "neuropsychological testing"                                                                                   | Migraine group had higher depression scores on neuropsychological testing* (p<0.05)                                        | N/A | 2/7 domains adequate  |
| Marates J et al, 1982 <sup>60</sup> | Case-control               | London, England   | Cases recruited from headache                                            | N=50 (36 with migraine, 14 controls)         | 5-15 years  | Not reported                         | Migraine ascertained with Research                       | Standardized psychiatric interview as developed by                                                                                      | 1. Depression: 4 (11%) with migraine vs.                                                                                   | N/A | 4/7 domains           |

|                                     |              |                |                                                                                                         |                                                    |            |                                    |                                                                                |                                                                                                                                                                                                                                  |                                                                                                                                                                                                                                              |     |                      |
|-------------------------------------|--------------|----------------|---------------------------------------------------------------------------------------------------------|----------------------------------------------------|------------|------------------------------------|--------------------------------------------------------------------------------|----------------------------------------------------------------------------------------------------------------------------------------------------------------------------------------------------------------------------------|----------------------------------------------------------------------------------------------------------------------------------------------------------------------------------------------------------------------------------------------|-----|----------------------|
|                                     |              |                | clinic, controls recruited from dental clinic                                                           |                                                    |            |                                    | Group on Migraine and Headache of the World Federation of Neurology definition | Rutter and Graham                                                                                                                                                                                                                | 0 (0%) controls had depression<br>2. Anxiety: 6 (13.3%) with migraine vs. 1 (3.7%) controls had anxiety<br>NB. No hypothesis testing done                                                                                                    |     | adequate             |
| Mazzone L et al, 2006 <sup>61</sup> | Case-control | Catania, Italy | Cases recruited from headache clinic; controls recruited from pediatric clinic data (well child visits) | N=150 (67 with migraine, 47 with TTH, 36 controls) | 6-16 years | N=69 females (54%); 81 males (46%) | Primary headache diagnosis according to ICHD criteria                          | 1. Depression: The Child Behavior Checklist was used to measure internalizing symptoms; the Children's Depression Inventory (CDI) was used to measure depressive symptoms<br>2. The Child Behavior Checklist was used to measure | 1. Internalizing: CBCL internalizing scores higher in migraine and TTH group compared to controls* (61.59 ±9.87 vs. 66.03 ±10.79 vs. 51.02 ±7.21, F=25.67, p<0.0001); high proportion of migraine group with pathological CBCL internalizing | N/A | 5/7 domains adequate |

|  |  |  |  |  |  |  |  |                                                                                                                            |                                                                                                                                                                                                                                                                                                                                                                                                                                     |  |
|--|--|--|--|--|--|--|--|----------------------------------------------------------------------------------------------------------------------------|-------------------------------------------------------------------------------------------------------------------------------------------------------------------------------------------------------------------------------------------------------------------------------------------------------------------------------------------------------------------------------------------------------------------------------------|--|
|  |  |  |  |  |  |  |  | <p>internalizing symptoms; the Multidimensional Anxiety Scale for Children (MASC) was used to measure anxiety symptoms</p> | <p>g scores than controls* (33% vs. 0%, <math>p &lt; 0.01</math>)</p> <p>2. Depression: CDI scores higher in migraine and TTH as compared to controls* (<math>9.57 \pm 6.47</math> vs. <math>11.0 \pm 6.72</math> vs. <math>7.2 \pm 1.14</math>, <math>F = 4.52</math>, <math>p &lt; 0.05</math>); no difference in proportion with pathological CDI scores between migraine vs. TTH vs. control group (10% vs. 13% vs. 0%, NS)</p> |  |
|--|--|--|--|--|--|--|--|----------------------------------------------------------------------------------------------------------------------------|-------------------------------------------------------------------------------------------------------------------------------------------------------------------------------------------------------------------------------------------------------------------------------------------------------------------------------------------------------------------------------------------------------------------------------------|--|

|                                      |                         |                |                                                           |                                     |                                                                   |                                       |                                                                   |                                                                                      |                                                                                                                                               |     |                      |
|--------------------------------------|-------------------------|----------------|-----------------------------------------------------------|-------------------------------------|-------------------------------------------------------------------|---------------------------------------|-------------------------------------------------------------------|--------------------------------------------------------------------------------------|-----------------------------------------------------------------------------------------------------------------------------------------------|-----|----------------------|
|                                      |                         |                |                                                           |                                     |                                                                   |                                       |                                                                   |                                                                                      | 3. Anxiety: MASC scores higher in migraine and TTH group as compared to controls* (41.77 ±13.9 vs. 46.4 ±18.49 vs. 36 ±6.06, F=5.45, p<0.001) |     |                      |
| McGinley J et al, 2019 <sup>62</sup> | Cohort                  | USA            | Population-based                                          | N=5,608                             | Grade 7-12 students followed through 4 survey waves over 14 years | Not reported                          | Migraine as per parent report at Wave 1 (baseline in adolescents) | Centers for Epidemiologic Studies Depression (CES-D) measure at each wave            | The main effect growth curve (multilevel) model demonstrated that depression scores were higher in the migraine vs. control group (p<0.0001)* | N/A | 4/8 domains adequate |
| Nardello R et al, 2014 <sup>63</sup> | Case-control (abstract) | Palermo, Italy | Cases recruited from hospital and controls recruited from | N=18 (6 with migraine, 12 controls) | 6-9 years                                                         | N=15 (83.3%) females, 3 (16.7%) males | Migraine diagnosis according to ICHD criteria                     | Kiddie – Schedule for Affective Disorders and Schizophrenia for School Aged Children | None of the children with migraine nor the controls met criteria for any psychiatric diagnoses                                                | N/A | 5/7 domains adequate |

|                                          |                            |                    |                                                      |                                                                    |            |              |                                                   |                                                                                                                                                            |                                                                                                                                                                                                                                                                                      |     |                       |
|------------------------------------------|----------------------------|--------------------|------------------------------------------------------|--------------------------------------------------------------------|------------|--------------|---------------------------------------------------|------------------------------------------------------------------------------------------------------------------------------------------------------------|--------------------------------------------------------------------------------------------------------------------------------------------------------------------------------------------------------------------------------------------------------------------------------------|-----|-----------------------|
|                                          |                            |                    | community                                            |                                                                    |            |              |                                                   | (Kiddie SADS)                                                                                                                                              |                                                                                                                                                                                                                                                                                      |     |                       |
| Nesterovskiy Y et al, 2015 <sup>65</sup> | Cross-sectional (abstract) | Moscow, Russia     | Not reported                                         | N=187 with migraine                                                | 7-16 years | Not reported | Migraine diagnosis according to ICHD-II criteria  | Anxiety disorders diagnosed according to ICD-10 diagnostic criteria, and severity of anxiety symptoms ascertained with the Spence Children's Anxiety Scale | 46% (N=86) of migraine patients had "manifestations" of anxiety disorders, with 49% (N=56) having mild, 32% (N=37) having moderate, and 19% (N=16) having severe manifestations; 12% had generalized anxiety disorder, 33% had social anxiety disorder, and 55% had specific phobias | N/A | 2/10 domains adequate |
| Nita S et al, 2020 <sup>65</sup>         | Case-control               | Bucharest, Romania | Unclear where cases and controls were recruited from | N=34 (18 with migraine, 16 controls with other headache disorders) | 5-17 years | Not reported | Migraine diagnosis according to ICHD-III criteria | Anxiety symptoms were measured using the Achenbach System of Empirically Based Assessment (ASEBA) and clinical cut-off for anxiety                         | 1. The mean ASEBA anxiety scale score was no different between groups (p=0.083; no raw scores given)<br>2. There was no                                                                                                                                                              | N/A | 4/7 domains adequate  |

|                                    |                            |                 |                                                         |                                                                       |            |                                        |                                                   |                                 |                                                                                                                                                                                                                                                                                                       |     |                       |
|------------------------------------|----------------------------|-----------------|---------------------------------------------------------|-----------------------------------------------------------------------|------------|----------------------------------------|---------------------------------------------------|---------------------------------|-------------------------------------------------------------------------------------------------------------------------------------------------------------------------------------------------------------------------------------------------------------------------------------------------------|-----|-----------------------|
|                                    |                            |                 |                                                         |                                                                       |            |                                        |                                                   | set at percentile $\geq 93$     | <p>difference in clinical levels of anxiety comparing the migraine vs. other headache group (80% vs. 75%, <math>p=0.739</math>)</p> <p>3. The odds of anxiety did not differ between migraine vs. other headache group (OR=0.75 <math>\pm</math> 0.866, 95% CI=0.137-4.095, <math>p=0.740</math>)</p> |     |                       |
| Onofri A et al, 2019 <sup>66</sup> | Cross-sectional (abstract) | L'Aquila, Italy | Migraine cases recruited from neurology hospital clinic | N=106 (N=76 with migraine without aura, N=30 with migraine with aura) | 4-17 years | N=62 females (58.5%), 44 males (41.5%) | Migraine diagnosis according to ICHD-III criteria | Child Behavior Checklist (CBCL) | No difference in the prevalence of internalizing disorders for migraine without aura vs. migraine with aura (56% of migraine without aura                                                                                                                                                             | N/A | 2/10 domains adequate |

|                                   |              |                               |                                                                                  |                                          |            |                                        |                                               |                                                                                                                                                                                                                                                                                                          |                                                                                                                                                                                                                                                                                                                                      |     |                      |
|-----------------------------------|--------------|-------------------------------|----------------------------------------------------------------------------------|------------------------------------------|------------|----------------------------------------|-----------------------------------------------|----------------------------------------------------------------------------------------------------------------------------------------------------------------------------------------------------------------------------------------------------------------------------------------------------------|--------------------------------------------------------------------------------------------------------------------------------------------------------------------------------------------------------------------------------------------------------------------------------------------------------------------------------------|-----|----------------------|
|                                   |              |                               |                                                                                  |                                          |            |                                        |                                               |                                                                                                                                                                                                                                                                                                          | vs. 66% of migraine with aura group; total 41.5% of sample had internalizing disorders; raw CBCL scores not available)                                                                                                                                                                                                               |     |                      |
| Oztop D et al, 2016 <sup>68</sup> | Case-control | Turkey (details not specific) | Migraine cases recruited from neurology clinic; unclear how cases were recruited | N=70 (N=35 with migraine, N=35 controls) | 9-16 years | N=52 (74.3%) females, 18 (25.7%) males | Migraine diagnosis according to ICHD criteria | <ol style="list-style-type: none"> <li>1. Depression: Ascertain ed using Kiddie – Schedule for Affective Disorders and Schizophrenia for School Aged Children (Kiddie-SADS) and Kovacs Children Depression Inventory (Kovacs-CDI)</li> <li>2. Anxiety: Ascertain ed using Kiddie-SADS, State-</li> </ol> | <ol style="list-style-type: none"> <li>1. Depression : major depression in 2 (5.7%) of migraine cases, adjustment disorder in 3 (8.6%) of migraine cases; mean Kovacs-CDI scores were higher in the migraine group* (11 vs. 7, Z=2.426, p=0.015)</li> <li>2. Anxiety: generalize d anxiety in 1 (2.9%) of migraine cases,</li> </ol> | N/A | 4/7 domains adequate |



|                                      |              |               |                                                                                                          |                                               |            |                                                                                                          |                                               |                                                                                                                                                                                       |                                                                                                                                                                                                              |     |                      |
|--------------------------------------|--------------|---------------|----------------------------------------------------------------------------------------------------------|-----------------------------------------------|------------|----------------------------------------------------------------------------------------------------------|-----------------------------------------------|---------------------------------------------------------------------------------------------------------------------------------------------------------------------------------------|--------------------------------------------------------------------------------------------------------------------------------------------------------------------------------------------------------------|-----|----------------------|
|                                      |              |               |                                                                                                          |                                               |            |                                                                                                          |                                               | Trait Anxiety Inventory for Children (STAIC) for those <12yo, and Spielberg State-Trait Anxiety Inventory for >12yo                                                                   | separation anxiety in 4 (11.4%) of migraine cases; no significant differences were found between migraine and control groups on STAIC (Table 1 in manuscript )                                               |     |                      |
| Pakalnis A et al, 2005 <sup>69</sup> | Case-control | Columbus, USA | Cases recruited from headache clinic, controls recruited from pediatric clinics during routine physicals | N=80 (47 with episodic migraine, 33 controls) | 6-17 years | N=21 females with migraine (44.6% of migraine sample), 26 males with migraine (55.3% of migraine sample) | Migraine diagnosis according to ICHD criteria | Child Symptom Inventory (CSI-4) or Adolescent Symptom Inventory (ASI-4); those with high scores had semi-structured interview with psychologist using Barkley & Murphy 1988 interview | 1. Depression association: 1 (2.1%) of migraine group vs. 0 (%) of controls had depression; no difference between CSI-4 and ASI-4 depression scores (55.24 ± 8.32 for migraine vs. 55.36 ± 5.3 for controls) | N/A | 4/7 domains adequate |

|                                      |              |               |                                                          |                                                                |             |                                    |                                                  |                                                    |                                                                                                                                                                                                                                                                                                                        |     |                      |
|--------------------------------------|--------------|---------------|----------------------------------------------------------|----------------------------------------------------------------|-------------|------------------------------------|--------------------------------------------------|----------------------------------------------------|------------------------------------------------------------------------------------------------------------------------------------------------------------------------------------------------------------------------------------------------------------------------------------------------------------------------|-----|----------------------|
|                                      |              |               |                                                          |                                                                |             |                                    |                                                  |                                                    | 2. Anxiety association: 7 (14.9%) of migraine group vs. 1 (3.0%) of controls had anxiety; CSI-4 and ASI-4 generalized anxiety disorder scores were higher in migraine than controls* (59.24 ± 9.44 in migraine vs. 54.36 ± 6.64 in controls) t(62)=-4.87, p<0.05), though all migraine scores were within normal range |     |                      |
| Pakalnis A et al, 2009 <sup>70</sup> | Case-control | Columbus, USA | Cases recruited from headache clinic; controls recruited | N=48 (N=15 with episodic migraine, N=15 with chronic migraine, | 13-17 years | N=25 females (52.0%); N=23 (48.0%) | Migraine diagnosis according to ICHD-II criteria | 1. Depression: measured using the Child Depression | 1. Depression : depression T scores were higher among the                                                                                                                                                                                                                                                              | N/A | 4/7 domains adequate |

|  |  |  |                              |                   |  |  |  |                                                                                                                                                                                        |                                                                                                                                                                                                                                                                                                                                                                                                                                                                                     |  |
|--|--|--|------------------------------|-------------------|--|--|--|----------------------------------------------------------------------------------------------------------------------------------------------------------------------------------------|-------------------------------------------------------------------------------------------------------------------------------------------------------------------------------------------------------------------------------------------------------------------------------------------------------------------------------------------------------------------------------------------------------------------------------------------------------------------------------------|--|
|  |  |  | from<br>pediatric<br>clinics | N=18<br>controls) |  |  |  | Inventory<br>(CDI),<br>and the<br>Adolescen<br>t<br>Symptom<br>Inventory-<br>4 (ASI-4)<br>2. Anxiety:<br>measured<br>using the<br>Adolescen<br>t<br>Symptom<br>Inventory-<br>4 (ASI-4) | migraine<br>group as<br>compared<br>to the<br>controls on<br>the CDI*<br>(mean=50.<br>9 in<br>migraine<br>vs. 41.9 in<br>control<br>group,<br>p<0.01),<br>and on the<br>ASI-4*<br>(mean=62.<br>4 in<br>migraine<br>vs. 52.6 in<br>control<br>group,<br>p<0.05);<br>dysthymia<br>T scores<br>on the CDI<br>were also<br>higher in<br>the<br>migraine<br>group*<br>(64.8 in<br>migraine<br>vs. 57.2 in<br>control<br>group,<br>p<0.05);<br>chronic<br>migraine<br>group had<br>higher |  |
|--|--|--|------------------------------|-------------------|--|--|--|----------------------------------------------------------------------------------------------------------------------------------------------------------------------------------------|-------------------------------------------------------------------------------------------------------------------------------------------------------------------------------------------------------------------------------------------------------------------------------------------------------------------------------------------------------------------------------------------------------------------------------------------------------------------------------------|--|

|                                          |                  |                   |                                                                                                  |                                                                                                          |               |                                                           |                                                               |                                                                                                                                                                                        |                                                                                                                                                                                                                                                                                                                                                        |     |                                    |
|------------------------------------------|------------------|-------------------|--------------------------------------------------------------------------------------------------|----------------------------------------------------------------------------------------------------------|---------------|-----------------------------------------------------------|---------------------------------------------------------------|----------------------------------------------------------------------------------------------------------------------------------------------------------------------------------------|--------------------------------------------------------------------------------------------------------------------------------------------------------------------------------------------------------------------------------------------------------------------------------------------------------------------------------------------------------|-----|------------------------------------|
|                                          |                  |                   |                                                                                                  |                                                                                                          |               |                                                           |                                                               |                                                                                                                                                                                        | <p>dysthymia<br/>T scores<br/>than<br/>episodic<br/>migraine<br/>group*<br/>(69.4 for<br/>chronic vs.<br/>60.5 for<br/>episodic<br/>migraine<br/>group,<br/>p&lt;0.05)</p> <p>2. Anxiety:<br/>generalize<br/>d anxiety T<br/>scores on<br/>the ASI-4<br/>were<br/>higher in<br/>the<br/>migraine<br/>group*<br/>(62.4 vs.<br/>51.8,<br/>p&lt;0.01)</p> |     |                                    |
| Pavone P<br>et al,<br>2012 <sup>71</sup> | Case-<br>control | Catania,<br>Italy | Cases<br>recruited<br>from<br>pediatric<br>clinics,<br>controls<br>recruited<br>from<br>hospital | N=560<br>(N=280 with<br>headache –<br>N=56 with<br>migraine and<br>N=224 with<br>TTH; N=280<br>controls) | 4-14<br>years | N=210<br>(37.5%)<br>females,<br>N=350<br>(62.5%)<br>males | Migraine<br>diagnosis<br>according<br>to ICHD-<br>II criteria | <p>1. Depressio<br/>n:<br/>ascertain<br/>ed using<br/>Clinical<br/>Diagnosti<br/>c<br/>Interview,<br/>Child<br/>Behavior<br/>Checklist<br/>(CBCL)</p> <p>2. Anxiety:<br/>Ascertain</p> | <p>1. Depression<br/>: anxiety-<br/>depression<br/>was more<br/>frequent in<br/>migraine<br/>group than<br/>in TTH<br/>group*<br/>(44.6 vs.<br/>27.7%)<br/>p=0.014)</p> <p>2. Anxiety:<br/>anxiety-</p>                                                                                                                                                | N/A | 6/7<br>doma<br>ins<br>adequ<br>ate |

|                                    |                 |             |                                |                                                                                       |            |                                         |                                                          |                                                                                                               |                                                                                                                                                                                                                                        |     |                       |
|------------------------------------|-----------------|-------------|--------------------------------|---------------------------------------------------------------------------------------|------------|-----------------------------------------|----------------------------------------------------------|---------------------------------------------------------------------------------------------------------------|----------------------------------------------------------------------------------------------------------------------------------------------------------------------------------------------------------------------------------------|-----|-----------------------|
|                                    |                 |             |                                |                                                                                       |            |                                         |                                                          | ed using Clinical Diagnostic Interview, CBCL, and Children's Yale-Brown Obsessive-Compulsive Scale (CY-BOCS)  | depression was more frequent in migraine group than in TTH group* (44.6 vs. 27.7%) p=0.014); OCD was more frequent in migraine group than in TTH group* (8.9 vs. 1.3%, p=0.002)<br>*NB. Results not compared for migraine vs. controls |     |                       |
| Rabner J et al, 2018 <sup>72</sup> | Cross-sectional | Boston, USA | Recruited from headache clinic | N=527 (52.7% with migraine, 29.8% with TTH, 17.5% with new daily persistent headache) | 7-17 years | N=344 (65.3% females; 183 (34.7%) males | Primary headache diagnosis according to ICHD-II criteria | 1. Depression: Ascertain ed using the Children's Depression Inventory (CDI)<br>3. Anxiety: Ascertain ed using | 1. Depression: Mean CDI T score 48.03 ± 9.75 for migraine group, 51.7 ± 12.86 for TTH group and 52.63 ± 12.50 for NDPH group                                                                                                           | N/A | 6/10 domains adequate |

|  |  |  |  |  |  |  |  |                                                                               |                                                                                                                                                                                                                                                                                                                                         |  |  |
|--|--|--|--|--|--|--|--|-------------------------------------------------------------------------------|-----------------------------------------------------------------------------------------------------------------------------------------------------------------------------------------------------------------------------------------------------------------------------------------------------------------------------------------|--|--|
|  |  |  |  |  |  |  |  | the Revised Children's Manifest Anxiety Scale-2 <sup>nd</sup> Edition (RCMAS) | (p<0.001 for group comparisons); depression was lower in migraine as compared to TTH and NDPH groups*<br>3. Anxiety: Mean RCMAS T score 44.91 ± 9.52 for migraine group, 47.89 ± 11.63 for TTH group and 47.98 ± 11.11 for NDPH group (p=0.05 for group comparisons); anxiety was lower in migraine as compared to TTH and NDPH groups* |  |  |
|--|--|--|--|--|--|--|--|-------------------------------------------------------------------------------|-----------------------------------------------------------------------------------------------------------------------------------------------------------------------------------------------------------------------------------------------------------------------------------------------------------------------------------------|--|--|

|                                   |              |                |                                                                                                                        |                                                                               |            |                                        |                                                          |                                                                                                                                                                                                                                                                                                        |                                                                                                                                                                                                                                                                                                                                                                                                                     |     |                      |
|-----------------------------------|--------------|----------------|------------------------------------------------------------------------------------------------------------------------|-------------------------------------------------------------------------------|------------|----------------------------------------|----------------------------------------------------------|--------------------------------------------------------------------------------------------------------------------------------------------------------------------------------------------------------------------------------------------------------------------------------------------------------|---------------------------------------------------------------------------------------------------------------------------------------------------------------------------------------------------------------------------------------------------------------------------------------------------------------------------------------------------------------------------------------------------------------------|-----|----------------------|
| Reale L et al, 2011 <sup>73</sup> | Case-control | Catania, Italy | Cases recruited from neurology clinic, controls recruited from database of healthy children visiting pediatric clinics | N=60 (N=20 with migraine, N=21 with benign paroxysmal vertigo, N=19 controls) | 4-15 years | N=34 females (56.7%); 26 males (43.3%) | Primary headache diagnosis according to ICHD-II criteria | <ol style="list-style-type: none"> <li>1. Depression: measured using the Child Behavior Checklist (CBCL), and the Children's Depression Inventory (CDI)</li> <li>2. Anxiety: measured using the Child Behavior Checklist (CBCL), and the Multidimensional Anxiety Scale for Children (MASC)</li> </ol> | <ol style="list-style-type: none"> <li>1. Depression: migraine group had higher mean CBCL internalizing score than control group* (66.47 ±6.33 vs. 58.27 ±7.94 (p&lt;0.01); migraine group had higher mean CDI score than control group* (13.74 ±7.85 vs. 7.0 ±4.96, p&lt;0.001); a larger proportion of the migraine group had pathological CBCL internalizing scores as compared to controls* (60% vs.</li> </ol> | N/A | 5/7 domains adequate |
|-----------------------------------|--------------|----------------|------------------------------------------------------------------------------------------------------------------------|-------------------------------------------------------------------------------|------------|----------------------------------------|----------------------------------------------------------|--------------------------------------------------------------------------------------------------------------------------------------------------------------------------------------------------------------------------------------------------------------------------------------------------------|---------------------------------------------------------------------------------------------------------------------------------------------------------------------------------------------------------------------------------------------------------------------------------------------------------------------------------------------------------------------------------------------------------------------|-----|----------------------|

|                                               |                 |               |                                        |                                                                              |            |                                          |                                                          |                                                                       |                                                                                                                                                                                                                                                                                                                                      |     |                       |
|-----------------------------------------------|-----------------|---------------|----------------------------------------|------------------------------------------------------------------------------|------------|------------------------------------------|----------------------------------------------------------|-----------------------------------------------------------------------|--------------------------------------------------------------------------------------------------------------------------------------------------------------------------------------------------------------------------------------------------------------------------------------------------------------------------------------|-----|-----------------------|
|                                               |                 |               |                                        |                                                                              |            |                                          |                                                          |                                                                       | 21%,<br>p<0.05)<br>2. Anxiety:<br>migraine<br>group had<br>higher<br>mean<br>MASC<br>score than<br>control<br>group*<br>(60.05<br>±7.28 vs.<br>46.57<br>±6.74,<br>p<0.001);<br>a larger<br>proportion<br>of the<br>migraine<br>group had<br>pathologic<br>al MASC<br>scores than<br>control<br>group*<br>(65% vs.<br>0%,<br>p<0.001) |     |                       |
| Rousseau-Salvador C et al, 2013 <sup>74</sup> | Cross-sectional | Paris, France | Cases recruited from a headache clinic | N=368 (N=88 with migraine, N=32 with TTH, N=248 with mixed migraine and TTH) | 8-17 years | N=201 females (54.6%); 167 males (45.4%) | Primary headache diagnosis according to ICHD-II criteria | 1. Depression: measured using the Multiscore Depression Inventory for | 1. Depression: the mean MDI-C score for the migraine group was 49.4 ±8.5 vs. 50 ±10 for normative                                                                                                                                                                                                                                    | N/A | 7/10 domains adequate |



|  |  |  |  |  |  |  |  |                                                                                                                 |                                                                                                                                                                                                                                                                                                                                                                                                                             |  |  |
|--|--|--|--|--|--|--|--|-----------------------------------------------------------------------------------------------------------------|-----------------------------------------------------------------------------------------------------------------------------------------------------------------------------------------------------------------------------------------------------------------------------------------------------------------------------------------------------------------------------------------------------------------------------|--|--|
|  |  |  |  |  |  |  |  | <p>Children (MDI-C)</p> <p>2. Anxiety: measured using the Revised Children's Manifest Anxiety Scale (RCMAS)</p> | <p>data (no hypothesis test on this comparison); the migraine group did not differ from the general population in clinically relevant depression levels (3.4% vs. 5%)</p> <p>2. Anxiety: the mean RCMAS score for the migraine group was <math>49.4 \pm 9.6</math> vs. <math>50 \pm 10</math> for normative data (no hypothesis test on this comparison); the migraine group did not differ from the general population</p> |  |  |
|--|--|--|--|--|--|--|--|-----------------------------------------------------------------------------------------------------------------|-----------------------------------------------------------------------------------------------------------------------------------------------------------------------------------------------------------------------------------------------------------------------------------------------------------------------------------------------------------------------------------------------------------------------------|--|--|

|                                               |                                                                                          |               |                                        |                                                                                             |            |                                          |                                                          |                                                                                                                                                                                                                                    |                                                                                                                                                                                                                                                                                                                                             |     |                       |
|-----------------------------------------------|------------------------------------------------------------------------------------------|---------------|----------------------------------------|---------------------------------------------------------------------------------------------|------------|------------------------------------------|----------------------------------------------------------|------------------------------------------------------------------------------------------------------------------------------------------------------------------------------------------------------------------------------------|---------------------------------------------------------------------------------------------------------------------------------------------------------------------------------------------------------------------------------------------------------------------------------------------------------------------------------------------|-----|-----------------------|
|                                               |                                                                                          |               |                                        |                                                                                             |            |                                          |                                                          |                                                                                                                                                                                                                                    | in clinically relevant anxiety levels (9.4% vs. 5%)                                                                                                                                                                                                                                                                                         |     |                       |
| Rousseau-Salvador C et al, 2014 <sup>75</sup> | Cross-sectional (same population as Rousseau-Salvador et al, 2013, analyzed differently) | Paris, France | Cases recruited from a headache clinic | N=368 (N=297 with episodic headache, N=15 with chronic migraine, and N=56 with chronic TTH) | 8-17 years | N=201 females (54.6%); 167 males (45.4%) | Primary headache diagnosis according to ICHD-II criteria | <ol style="list-style-type: none"> <li>1. Depression: measured using the Multiscore Depression Inventory for Children (MDI-C)</li> <li>2. Anxiety: measured using the Revised Children's Manifest Anxiety Scale (RCMAS)</li> </ol> | <ol style="list-style-type: none"> <li>1. Depression: the chronic migraine group had higher mean MDI-C scores than the chronic TTH group* (59.5 ±7.0 vs. 51.4 ±8.4, t(69)=3.39, p&lt;0.001)</li> <li>2. Anxiety: the chronic migraine group had higher mean RCMAS scores than the chronic TTH group* (57.7 ±11.9 vs. 50.8 ±10.1,</li> </ol> | N/A | 5/10 domains adequate |

|                                       |              |                |                                                                                          |                                                          |                                                                     |                                          |                                                                |                                                                                                                                                                    |                                                                                                                                                                                                                                                                                                                                                                           |     |                      |
|---------------------------------------|--------------|----------------|------------------------------------------------------------------------------------------|----------------------------------------------------------|---------------------------------------------------------------------|------------------------------------------|----------------------------------------------------------------|--------------------------------------------------------------------------------------------------------------------------------------------------------------------|---------------------------------------------------------------------------------------------------------------------------------------------------------------------------------------------------------------------------------------------------------------------------------------------------------------------------------------------------------------------------|-----|----------------------|
|                                       |              |                |                                                                                          |                                                          |                                                                     |                                          |                                                                |                                                                                                                                                                    | t(69)=2.25,<br>p<0.05)                                                                                                                                                                                                                                                                                                                                                    |     |                      |
| Salerno M et al, 2017 <sup>76</sup>   | Case-control | Palermo, Italy | Not described                                                                            | N=350 (N=119 with migraine without aura; N=231 controls) | Unclear (mean age listed as $\pm 7.59$ $\pm 1.78$ – no range given) | N=167 females (47.7%); 183 males (52.3%) | Migraine without aura diagnosis according to ICHD-III criteria | Separation anxiety measured using the separation anxiety subscale of the Screen for Child Anxiety Related Emotional Disorders (SCARED)                             | Social anxiety subscale scores of the SCARED were higher in the migraine group vs. the control group* (6.83 $\pm$ 0.97 for migraine vs. 4.72 $\pm$ 0.32 for control group, p<0.001)                                                                                                                                                                                       | N/A | 5/7 domains adequate |
| Salvadori F et al, 2007 <sup>77</sup> | Case-control | Pisa, Italy    | Cases recruited from neurology clinic; controls recruited from community (local schools) | N=60 (N=30 with migraine; N=30 controls)                 | 7-16 years                                                          | N=48 females (80.0%); 12 males (20.0%)   | Migraine diagnosis according to ICHD-III criteria              | Mother completed the Child Behavior Checklist (CBCL) for three time periods: the present, when the child was aged 0-3 years, and when the child was aged 4-6 years | The migraine group had significantly higher CBCL internalizing scores than the control group for all time periods* (0-3 years: 45.8 $\pm$ 10.1 vs. 41.3 $\pm$ 6.2, p<0.05; 4-6 years: 56.1 $\pm$ 8.6 vs. 41.8 $\pm$ 7.2, p<0.001; present: 55.8 $\pm$ 11.0 vs. 44.1 $\pm$ 9.0, p<0.001); the migraine group also had significantly higher CBCL anxious/depressed subscale | N/A | 7/7 domains adequate |

|                                   |              |              |                                                                                  |                                                                           |             |                                          |              |                                                                                                                                                                                                 |                                                                                                                                                                                                                                                                                                              |     |                      |
|-----------------------------------|--------------|--------------|----------------------------------------------------------------------------------|---------------------------------------------------------------------------|-------------|------------------------------------------|--------------|-------------------------------------------------------------------------------------------------------------------------------------------------------------------------------------------------|--------------------------------------------------------------------------------------------------------------------------------------------------------------------------------------------------------------------------------------------------------------------------------------------------------------|-----|----------------------|
|                                   |              |              |                                                                                  |                                                                           |             |                                          |              |                                                                                                                                                                                                 | <p>scores for all periods* (0-3 years: 53.9 <math>\pm</math>6.4 vs. 50.5 <math>\pm</math>2.4, p&lt;0.01; 4-6 years: 56.5 <math>\pm</math>6.3 vs. 50.5 <math>\pm</math>1.7, p&lt;0.001; present: 56.2 <math>\pm</math>7.1 vs. 51.2 <math>\pm</math>2.8, p&lt;0.01)</p>                                        |     |                      |
| Smith M et al, 2003 <sup>79</sup> | Case-control | Seattle, USA | Cases recruited from headache clinic; controls recruited from community (school) | N=308 (N=179 with migraine; N=97 with chronic fatigue, and N=32 controls) | 11-18 years | N=193 females (62.7%); 115 males (37.3%) | Not reported | <p>1. Anxiety: measured using the Trait form of the Spielberger State-Trait Anxiety Inventory (STAI) Form X2</p> <p>2. Depression: Measured using the Children's Depression Inventory (CDI)</p> | <p>1. Anxiety: Mean STAI scores were higher in the migraine group vs. control group* (44.9 <math>\pm</math>7.2 vs. 39.1 <math>\pm</math>9.3, overall ANOVA F=7.766, p&lt;0.001)</p> <p>2. Depression: Mean CDI scores did not differ between the migraine vs. control group (7.7 <math>\pm</math>7.1 vs.</p> | N/A | 5/7 domains adequate |

|                                        |                         |                     |                                                                                     |                                                                                      |             |              |              |                                                                                                           |                                                                                                                                                                                                                                                                                                               |     |                      |
|----------------------------------------|-------------------------|---------------------|-------------------------------------------------------------------------------------|--------------------------------------------------------------------------------------|-------------|--------------|--------------|-----------------------------------------------------------------------------------------------------------|---------------------------------------------------------------------------------------------------------------------------------------------------------------------------------------------------------------------------------------------------------------------------------------------------------------|-----|----------------------|
|                                        |                         |                     |                                                                                     |                                                                                      |             |              |              |                                                                                                           | 6.6 ±6.8, overall ANOVA F=3.206, p<0.05)                                                                                                                                                                                                                                                                      |     |                      |
| Tereshchenko et al, 2017 <sup>80</sup> | Case-control (abstract) | Krasnoyarsk, Russia | Cases recruited from tertiary medical center, unclear where controls were recruited | N=404 (N=89 with migraine, N=109 with TTH, N=26 with mixed headache, N=180 controls) | 12-18 years | Not reported | Not reported | Development and Well-Being Assessment (DAWBA) semi-structured interview to diagnose psychiatric disorders | 1. Depression : Predicted probability of depressive disorder was higher in migraine vs. controls (3.26 vs. 1.11, p=0.002)<br>2. Anxiety: Predicted probability of generalized anxiety disorder (1.07 vs. 0.10, p<0.001) and posttraumatic stress disorder (1.10 vs. 0.08, p=0.008) was higher in migraine vs. | N/A | 3/7 domains adequate |

|                                         |                                       |                                              |                                                                                                                                   |                                                                       |                |                                                         |                                                                                           |                                                                                                                              |                                                                                                                                                                                     |                                                                                                                                                                                                                                               |                                     |
|-----------------------------------------|---------------------------------------|----------------------------------------------|-----------------------------------------------------------------------------------------------------------------------------------|-----------------------------------------------------------------------|----------------|---------------------------------------------------------|-------------------------------------------------------------------------------------------|------------------------------------------------------------------------------------------------------------------------------|-------------------------------------------------------------------------------------------------------------------------------------------------------------------------------------|-----------------------------------------------------------------------------------------------------------------------------------------------------------------------------------------------------------------------------------------------|-------------------------------------|
|                                         |                                       |                                              |                                                                                                                                   |                                                                       |                |                                                         |                                                                                           |                                                                                                                              | controls;<br>no<br>differences<br>in specific<br>phobia,<br>social<br>phobia, or<br>obsessive<br>compulsiv<br>e disorder                                                            |                                                                                                                                                                                                                                               |                                     |
| Trent H<br>et al,<br>2020 <sup>81</sup> | Cross-<br>sectional<br>(abstract<br>) | USA<br>(unclear<br>if<br>Indiana<br>or Ohio) | Recruitme<br>nt from<br>headache<br>clinic                                                                                        | N=374                                                                 | 6-18<br>years  | Not<br>reported                                         | Not<br>reported                                                                           | Not reported                                                                                                                 | N=57 (15.2%)<br>of the total<br>participants<br>with migraine<br>were<br>categorized as<br>depressed<br>(unclear how<br>this was<br>ascertained)                                    | N/A                                                                                                                                                                                                                                           | 1/10<br>doma<br>ins<br>adequ<br>ate |
| Uçar H<br>et al,<br>2020 <sup>82</sup>  | Case-<br>control                      | Turkey                                       | Cases<br>recruited<br>from<br>headache<br>clinic,<br>controls<br>recruited<br>from<br>hospital<br>(routine<br>check-up<br>visits) | N=112<br>(N=71 with<br>migraine<br>without aura,<br>N=41<br>controls) | 12-17<br>years | N=81<br>females<br>(72.3%);<br>N=31<br>males<br>(27.7%) | Migraine<br>without<br>aura<br>diagnosis<br>according<br>to ICHD-<br>III beta<br>criteria | Anxiety<br>symptoms<br>measured<br>using the<br>Screen for<br>Child Anxiety<br>Related<br>Emotional<br>Disorders<br>(SCARED) | The migraine<br>group had<br>significantly<br>higher mean<br>SCARED<br>scores<br>compared to<br>the control<br>group*<br>(23.11±12.68<br>vs.<br>13.34±8.64,<br>t=4.832,<br>p<0.001) | In the<br>ANCOVA<br>model, the<br>migraine<br>group had<br>higher<br>SCARED<br>scores<br>compared to<br>controls<br>after<br>controlling<br>for the<br>effect of<br>age, gender,<br>family<br>income, and<br>parental<br>education<br>levels* | 6/7<br>doma<br>ins<br>adequ<br>ate  |

|                                         |              |              |                                                                                            |                                                   |             |                                      |                                                                |                                                                                                                                                                                                                                                  |                                                                                                                                                                                                                                                                                                                                                         |                     |                      |
|-----------------------------------------|--------------|--------------|--------------------------------------------------------------------------------------------|---------------------------------------------------|-------------|--------------------------------------|----------------------------------------------------------------|--------------------------------------------------------------------------------------------------------------------------------------------------------------------------------------------------------------------------------------------------|---------------------------------------------------------------------------------------------------------------------------------------------------------------------------------------------------------------------------------------------------------------------------------------------------------------------------------------------------------|---------------------|----------------------|
|                                         |              |              |                                                                                            |                                                   |             |                                      |                                                                |                                                                                                                                                                                                                                                  |                                                                                                                                                                                                                                                                                                                                                         | (F=15.153, p<0.001) |                      |
| Uyar Cankay T et al, 2021 <sup>83</sup> | Case-control | Rize, Turkey | Cases recruited from neurology clinic, controls recruited from community (classroom peers) | N=100 (N=50 with chronic migraine, N=50 controls) | 12-18 years | N=78 females (78%); N=22 males (22%) | Chronic migraine (CM) diagnosis according to ICHD-III criteria | 1. Psychiatric diagnoses ascertained using Kiddie – Schedule for Affective Disorders and Schizophrenia for School Aged Children (Kiddie-SADS)<br>2. Psychiatric symptoms measured using the DSM-V Level 1 Cross-Cutting Symptom Measure (CCSM-5) | 1. Anxiety: N=6 (12%) with CM had generalized anxiety disorder; N=1 (2%) with CM had obsessive compulsive disorder; Mean anxiety symptoms on CCSM-5) higher in CM group than in control group* (59.49 vs. 41.51, Z=-3.125, p=0.002)<br>2. Depression : N=8 (16%) with chronic migraine had major depressive disorder; Mean depression symptoms on CCSM- | N/A                 | 6/7 domains adequate |

|                                       |              |             |                                                                           |                                                                      |                                                                             |                                         |                                                          |                                                                                                                                 |                                                                                                                                                                                                                              |     |                      |
|---------------------------------------|--------------|-------------|---------------------------------------------------------------------------|----------------------------------------------------------------------|-----------------------------------------------------------------------------|-----------------------------------------|----------------------------------------------------------|---------------------------------------------------------------------------------------------------------------------------------|------------------------------------------------------------------------------------------------------------------------------------------------------------------------------------------------------------------------------|-----|----------------------|
|                                       |              |             |                                                                           |                                                                      |                                                                             |                                         |                                                          |                                                                                                                                 | V higher in CM group than in control group* (65.49 vs. 35.51, Z=-5.223, p<0.001)                                                                                                                                             |     |                      |
| Valeriani M et al, 2009 <sup>84</sup> | Case-control | Rome, Italy | Cases recruited from headache clinic, unclear how controls were recruited | N=38 (N=18 with migraine without aura, N=10 with TTH, N=10 controls) | Age range not reported (mean 10.5 ± 2 for migraine, 12.8 ± 2.8, 11.8 ± 2.5) | N=20 (52.6%) females, 18 (47.4%) males  | Primary headache diagnosis according to ICHD-II criteria | Parents completed the Child Behavior Checklist (CBCL)                                                                           | Scores on the internalizing subscale of the CBCL were highest in the TTH group (12.6 ± 6.1), intermediate in the migraine group (9.7 ± 7.4), and lowest in the control group (5.2 ± 3.3) (F <sub>2,34</sub> =8.77, p=0.0005) | N/A | 4/7 domains adequate |
| Vannatta K et al, 2008 <sup>85</sup>  | Case-control | Ohio, USA   | Cases recruited from headache clinic; controls recruited from schools     | N=93 (N=47 with migraine; N=46 controls)                             | 8-14 years                                                                  | N= 42 females (45.2%); 51 males (54.8%) | Migraine diagnosis according to ICHD-II criteria         | 1. Internalizing: Measured using the Child Behavior Checklist (CBCL)<br>2. Depression: Measured using the Children's Depression | 1. Internalizing: Mothers reported higher CBCL internalizing scores in migraine vs. control group* (57.18 ±10.15 vs. 49.84 ±8.83,                                                                                            | N/A | 5/7 domains adequate |



|  |  |  |  |  |  |  |  |  |                    |                                                                                                                                                                                                                                                                                                                                                                                                                                                                                                   |  |  |
|--|--|--|--|--|--|--|--|--|--------------------|---------------------------------------------------------------------------------------------------------------------------------------------------------------------------------------------------------------------------------------------------------------------------------------------------------------------------------------------------------------------------------------------------------------------------------------------------------------------------------------------------|--|--|
|  |  |  |  |  |  |  |  |  | Inventory<br>(CDI) | t(89)=3.83,<br>p=0.00);<br>mother<br>also<br>reported<br>higher<br>CBCL<br>anxious-<br>depressed<br>scores in<br>migraine<br>vs. control<br>group*<br>(57.96<br>±9.95 vs.<br>53.06<br>±5.39,<br>t(89)=2.76,<br>p=0.01);<br>mothers<br>reported<br>higher<br>proportion<br>of CBCL<br>internalizin<br>g scores<br>above the<br>clinical<br>cut-off in<br>the<br>migraine<br>vs. control<br>group*<br>(38% vs.<br>11% $\chi^2$<br>(1,91)=8.9<br>9, p<0.01),<br>fathers'<br>scores did<br>not differ |  |  |
|--|--|--|--|--|--|--|--|--|--------------------|---------------------------------------------------------------------------------------------------------------------------------------------------------------------------------------------------------------------------------------------------------------------------------------------------------------------------------------------------------------------------------------------------------------------------------------------------------------------------------------------------|--|--|

|                                    |              |                     |                                                               |                                                |            |                                                  |                                                       |                                                                      |                                                                                                                                                                                                                                                                                                                      |                                             |                      |
|------------------------------------|--------------|---------------------|---------------------------------------------------------------|------------------------------------------------|------------|--------------------------------------------------|-------------------------------------------------------|----------------------------------------------------------------------|----------------------------------------------------------------------------------------------------------------------------------------------------------------------------------------------------------------------------------------------------------------------------------------------------------------------|---------------------------------------------|----------------------|
|                                    |              |                     |                                                               |                                                |            |                                                  |                                                       |                                                                      | <p>between groups</p> <p>2. Depression : Mean CDI scores did not differ between migraine vs. control group (7.28 ±5.73 vs. 5.65 ±6.21, t=1.38, p=0.17); no difference between migraine vs. controls on proportion with CDI score above clinical cut-off (6% vs. 7%, <math>\chi^2</math> (1,93)=0.001, p&lt;0.05)</p> |                                             |                      |
| Wagner J et al, 2014 <sup>86</sup> | Case-control | South Carolina, USA | Cases and controls identified through a surveillance database | N=32,530 (N=10,495 with migraine, N=6,730 with | 6-18 years | N=15,288 (47.0%) females, N=17,242 (53.0%) males | Migraine, epilepsy, and fracture diagnoses identified | Comorbid mental health diagnoses identified by searching ICD-9 codes | 1. Depression : Higher odds of depression in the migraine                                                                                                                                                                                                                                                            | 1. Depression: Higher odds of depression in | 3/7 domains adequate |

|  |  |  |  |                                             |  |  |                                   |  |                                                                                                                                                                                                                                                                                                                                                                                                                   |                                                                                                                                                                                                                                                                                                                                                                                                                        |
|--|--|--|--|---------------------------------------------|--|--|-----------------------------------|--|-------------------------------------------------------------------------------------------------------------------------------------------------------------------------------------------------------------------------------------------------------------------------------------------------------------------------------------------------------------------------------------------------------------------|------------------------------------------------------------------------------------------------------------------------------------------------------------------------------------------------------------------------------------------------------------------------------------------------------------------------------------------------------------------------------------------------------------------------|
|  |  |  |  | epilepsy,<br>N=15,305<br>with<br>fractures) |  |  | by<br>searching<br>ICD-9<br>codes |  | group as<br>compared<br>to fracture<br>group in<br>both 6-<br>12yo*<br>(OR=1.85,<br>1.50-2.27)<br>and 13-<br>18yo*<br>(OR=3.56,<br>95%<br>CI=3.20-<br>3.97)<br>2. Anxiety:<br>Higher<br>odds of<br>anxiety in<br>the<br>migraine<br>group as<br>compared<br>to the<br>fracture<br>group in<br>both 6-<br>12yo*<br>(OR=2.67,<br>95%<br>CI=2.15-<br>3.32), and<br>13-18yo*<br>(OR=3.95,<br>95%<br>CI=3.50-<br>4.46) | the<br>migrain<br>e group<br>as<br>compare<br>d to<br>fracture<br>group in<br>both 6-<br>12yo<br>(aOR=1.<br>29,<br>1.04-<br>1.60)<br>and 13-<br>18yo<br>(aOR=1.<br>82, 95%<br>CI=1.61<br>-2.06)<br>2. Anxiety<br>: Higher<br>odds of<br>anxiety<br>in the<br>migrain<br>e group<br>as<br>compare<br>d to the<br>fracture<br>group in<br>both 6-<br>12yo<br>(aOR=1.<br>93, 95%<br>CI=1.54<br>-2.42),<br>and 13-<br>18yo |
|--|--|--|--|---------------------------------------------|--|--|-----------------------------------|--|-------------------------------------------------------------------------------------------------------------------------------------------------------------------------------------------------------------------------------------------------------------------------------------------------------------------------------------------------------------------------------------------------------------------|------------------------------------------------------------------------------------------------------------------------------------------------------------------------------------------------------------------------------------------------------------------------------------------------------------------------------------------------------------------------------------------------------------------------|

|                                    |                                                                       |                                    |                                                                                                                      |                                                                                                 |             |                                                                                                        |                                                                                           |                                                                                                                                                            |                                                                                                                                                                                                                                          |                                                                                             |                       |
|------------------------------------|-----------------------------------------------------------------------|------------------------------------|----------------------------------------------------------------------------------------------------------------------|-------------------------------------------------------------------------------------------------|-------------|--------------------------------------------------------------------------------------------------------|-------------------------------------------------------------------------------------------|------------------------------------------------------------------------------------------------------------------------------------------------------------|------------------------------------------------------------------------------------------------------------------------------------------------------------------------------------------------------------------------------------------|---------------------------------------------------------------------------------------------|-----------------------|
|                                    |                                                                       |                                    |                                                                                                                      |                                                                                                 |             |                                                                                                        |                                                                                           |                                                                                                                                                            |                                                                                                                                                                                                                                          | (OR=1.89, 95% CI=1.65-2.16)                                                                 |                       |
| Waldie K et al, 2014 <sup>87</sup> | Cross-sectional (from cohort study, data of interest cross-sectional) | Waitemata or Auckland, New Zealand | Community birth cohort of small for gestational age infants and random sample of average for gestational age infants | N=617 (N=65 with migraine, N=115 with TTH, N=337 no headache)                                   | 11 years    | N (migraine subgroup)=31 (47.4%) females; 34 (52.3%) males; larger group sex distribution not reported | Incidence of primary headaches at 11 years old, with diagnosis according to ICHD criteria | Depression ascertained at 11 years old using The Centre for Epidemiological Studies Depression Scale for Children (CES-DC) with cut-off scores             | 12.5% of migraine group had depression vs. 5.9% of controls (no hypothesis testing done to compare proportions); Symptoms of depression at age 11 were not significantly associated with migraine when compared to TTH (OR=2.26, p=0.06) | N/A                                                                                         | 4/10 domains adequate |
| Wang SJ et al, 2007 <sup>88</sup>  | Cross-sectional                                                       | Taitung County, Taiwan             | Recruited from community (school-based recruitment)                                                                  | N=121 with chronic daily headache, selected from larger cohort study (81 with chronic migraine) | 12-15 years | N=90 females; 31 males                                                                                 | Chronic daily headache diagnostic subgroup classified according to ICHD-II criteria       | Depressive and anxiety disorders ascertained using the Mini-International Neuropsychiatric Interview for Children and Adolescents (MINI-Kid, version 1.01) | 1. Depressive disorders: Chronic migraine diagnosis associated with MDD* (OR=4.6, 95% CI=1.3-16.4, p=0.01);                                                                                                                              | 1. Depressive disorders: Chronic migraine with aura associated with any depressive disorder | 7/10 domains adequate |

|  |  |  |  |  |  |  |  |                                |                                                                                                                                                                                                                                                                                                                                        |                                                                                                                                                                                                                                                                                             |  |
|--|--|--|--|--|--|--|--|--------------------------------|----------------------------------------------------------------------------------------------------------------------------------------------------------------------------------------------------------------------------------------------------------------------------------------------------------------------------------------|---------------------------------------------------------------------------------------------------------------------------------------------------------------------------------------------------------------------------------------------------------------------------------------------|--|
|  |  |  |  |  |  |  |  | administered by a psychiatrist | <p>2. Anxiety: Chronic migraine diagnosis associated with any anxiety disorder* (OR=3.8, 95% CI=1.5-9.5, p=0.004), panic disorder* (OR=6.6, 95% CI=1.5-30.0, p=0.006), social phobia* (16.0% vs. 0%, p=0.005)</p> <p>NB. Results for any depressive disorder, OCD and generalized anxiety disorder NS<br/>NB2. Raw data in Table 3</p> | <p>* (OR=4.1, 95% OR=1.0-16.4, p&lt;0.05) after controlling for sex and gender, not significant for chronic migraine without aura; chronic migraine with and without aura not associated with dysthymia (NS)</p> <p>2. Anxiety disorders: Chronic migraine without aura (OR=3.7, 95%=1.</p> |  |
|--|--|--|--|--|--|--|--|--------------------------------|----------------------------------------------------------------------------------------------------------------------------------------------------------------------------------------------------------------------------------------------------------------------------------------------------------------------------------------|---------------------------------------------------------------------------------------------------------------------------------------------------------------------------------------------------------------------------------------------------------------------------------------------|--|

|                                    |                 |                        |                                                     |                                                         |                  |                                              |                                                  |                                                                         |                                                                                                            |                                                                                                                                                                                                                         |                       |
|------------------------------------|-----------------|------------------------|-----------------------------------------------------|---------------------------------------------------------|------------------|----------------------------------------------|--------------------------------------------------|-------------------------------------------------------------------------|------------------------------------------------------------------------------------------------------------|-------------------------------------------------------------------------------------------------------------------------------------------------------------------------------------------------------------------------|-----------------------|
|                                    |                 |                        |                                                     |                                                         |                  |                                              |                                                  |                                                                         |                                                                                                            | 4-9.7, p<0.01) and chronic migraine with aura (OR=4.6, 95% CI=1.2-17.6, p<0.01) associated with any anxiety disorder * after controlling for age and gender<br>NB. Results for specific disorders in manuscript Table 3 |                       |
| Wang SJ et al, 2009 <sup>90</sup>  | Cross-sectional | Taitung County, Taiwan | Recruited from community (school-based recruitment) | N=3,963 (928 with migraine, 3,331 other or no headache) | 13-15 years      | N=1,923 females (48.5%); 2,040 males (51.5%) | Migraine diagnosis according to ICHD-II criteria | Depression: Ascertained using the Adolescent Depression Inventory (ADI) | Migraine group had higher mean ADI scores than those without migraine* (12.0 ± 6.7 vs. 7.9 ± 6.0, p<0.001) | N/A                                                                                                                                                                                                                     | 7/10 domains adequate |
| Wilcox S et al, 2018 <sup>91</sup> | Cross-sectional | Boston, USA            | Recruited from pediatric                            | N=359 with migraine                                     | ≤18 years (range | N=210 females (58.1%),                       | Migraine as diagnosed                            | 1. Depression: Ascertain                                                | 1. Depression : 13.2% of migraine                                                                          | N/A                                                                                                                                                                                                                     | 4/10 domains          |

|                                      |              |             |                                                                    |                                         |                              |                                         |                                                   |                                                                                                                                                                                                                                                                          |                                                                                                                                                                                                                                                                                                             |     |                      |
|--------------------------------------|--------------|-------------|--------------------------------------------------------------------|-----------------------------------------|------------------------------|-----------------------------------------|---------------------------------------------------|--------------------------------------------------------------------------------------------------------------------------------------------------------------------------------------------------------------------------------------------------------------------------|-------------------------------------------------------------------------------------------------------------------------------------------------------------------------------------------------------------------------------------------------------------------------------------------------------------|-----|----------------------|
|                                      |              |             | headache clinic                                                    |                                         | not specified, mean 12.5±3.1 | 149 males (41.5%)                       | by a neurologist (criteria used not specified)    | ed using the Child's Depression Inventory (CDI-2); if elevated score, clinical interview done and DSM-IV diagnosis made<br>2. Anxiety: Ascertained using the Revised Children's Manifest (RCMAS-2); if elevated score, clinical interview done and DSM-IV diagnosis made | patients had a depressive disorder<br>2. Anxiety: 32.8% of migraine patients had an anxiety disorder<br>3. Both anxiety and a depressive disorder: 9.8% had both an anxiety and a depressive disorder<br>NB. No hypothesis testing done to look at association between migraine and internalizing disorders |     | adequate             |
| Williams R et al, 2017 <sup>92</sup> | Case-control | Rome, Italy | Cases recruited from pediatric headache clinic; controls recruited | N=100 (100 with migraine, 100 controls) | 8-18 years                   | N=101 females (50.5%); 99 males (49.5%) | Migraine diagnosis according to ICHD-III criteria | Anxiety measured using the Self-Administered Psychiatric Scales for Children and                                                                                                                                                                                         | The migraine group had significantly higher scores on all SAFA subscales*: generalized anxiety                                                                                                                                                                                                              | N/A | 7/7 domains adequate |

|                                        |                                    |                   |                                                                                                                        |                                               |               |                 |                 |                                                                                       |                                                                                                                                                                                                                                                                                                                                                                                                                        |     |                                    |
|----------------------------------------|------------------------------------|-------------------|------------------------------------------------------------------------------------------------------------------------|-----------------------------------------------|---------------|-----------------|-----------------|---------------------------------------------------------------------------------------|------------------------------------------------------------------------------------------------------------------------------------------------------------------------------------------------------------------------------------------------------------------------------------------------------------------------------------------------------------------------------------------------------------------------|-----|------------------------------------|
|                                        |                                    |                   | from<br>communit<br>y (schools)                                                                                        |                                               |               |                 |                 | Adolescents<br>(SAFA)                                                                 | disorder<br>(47.92 $\pm$ 9.65<br>vs. 41.53<br>$\pm$ 8.26,<br>t(196)=5,<br>p<0.0001);<br>scholastic<br>anxiety (49.48<br>$\pm$ 10.32 vs.<br>42.89 $\pm$ 5.53,<br>t(196)=5.61,<br>p<0.0001);<br>separation and<br>loss anxiety<br>(45.31 $\pm$ 8.32<br>vs. 40.85<br>$\pm$ 9.76,<br>t(196)=3.46,<br>p<0.001);<br>social anxiety<br>disorder<br>(51.07 $\pm$ 9.93<br>vs. 45.24<br>$\pm$ 8.04,<br>t(196)=4.54,<br>p<0.0001) |     |                                    |
| Yilmaz<br>et al,<br>2017 <sup>93</sup> | Case-<br>control<br>(abstract<br>) | Ankara,<br>Turkey | Cases<br>recruited<br>from<br>neurology<br>clinic; did<br>not report<br>where<br>controls<br>were<br>recruited<br>from | N=90 (50<br>with<br>migraine, 40<br>controls) | 6-17<br>years | Not<br>reported | Not<br>reported | Depression<br>measured<br>using the<br>Children's<br>Depression<br>Inventory<br>(CDI) | No significant<br>difference was<br>found<br>comparing<br>migraine<br>group to<br>control group<br>on CDI scores<br>(raw scores<br>not published)                                                                                                                                                                                                                                                                      | N/A | 2/7<br>doma<br>ins<br>adequ<br>ate |

\*Statistically significant



NB. ICHD = International Classification of Headache Disorders; ICD = International Classification of Disease; TTH = tension-type headache; DSM = Diagnostic and Statistical Manual of Mental Disorders

**eTable 2. Summary of studies examining migraine outcomes (n=18)**

| Study                              | Design       | Location        | Setting                                                                                       | Sample size                          | Ages       | Sex                                    | Outcome                                                                                                                                                            | Exposure                                                                                                                                                                                     | Unadjusted results                                                                                                                                                 | Adjusted results                                                                                                                                              | Quality              |
|------------------------------------|--------------|-----------------|-----------------------------------------------------------------------------------------------|--------------------------------------|------------|----------------------------------------|--------------------------------------------------------------------------------------------------------------------------------------------------------------------|----------------------------------------------------------------------------------------------------------------------------------------------------------------------------------------------|--------------------------------------------------------------------------------------------------------------------------------------------------------------------|---------------------------------------------------------------------------------------------------------------------------------------------------------------|----------------------|
| Cooper P et al, 1987 <sup>95</sup> | Case-control | Halifax, Canada | Cases recruited from a neurology clinic and controls were best friend controls from community | N=78 (39 with migraine, 39 controls) | 6-16 years | N=40 females (51.2%); 38 males (48.7%) | 1.Migraine diagnosis according to Prensky criteria<br>2.Prognostic outcome: Migraine group kept a daily headache diary for 4 months and headache frequency (over 4 | Anxiety symptoms measured using State-Trait Anxiety Inventory for Children (STAIC), the Revised Children's Manifest Anxiety Scale (RCMAS), and parent-reported child anxiety via the Revised | 1.Anxiety measures correlated with outcomes using Pearson correlations: Higher RCMAS total scores* (r=0.31, for frequency and 0.27 for severity), and higher STAIC | When Pearson correlations adjusted for sex, significance was lost except for the STAIC state score for females*, which was correlated with headache frequency | 5/7 domains adequate |

|  |  |  |  |  |  |  |                                                                                                                           |                                            |                                                                                                                                                                                                                                                                                                                                                                                                                                     |                                                              |  |
|--|--|--|--|--|--|--|---------------------------------------------------------------------------------------------------------------------------|--------------------------------------------|-------------------------------------------------------------------------------------------------------------------------------------------------------------------------------------------------------------------------------------------------------------------------------------------------------------------------------------------------------------------------------------------------------------------------------------|--------------------------------------------------------------|--|
|  |  |  |  |  |  |  | months) and severity, on 1-3 scale, (sum of severity scores of all headaches over 4 months) assessed at 4-month follow-up | Personality Inventory for Children (PIC-R) | state* (r=0.55 for frequency and 0.53 for severity) and higher STAIC trait* (0.32 for frequency and 0.30 for severity) scores significantly associated with more frequent and severe headaches at follow-up<br>2.All anxiety measures placed in stepwise multiple regression model used to model the association between the prognostic outcomes and anxiety scores: 30% of the variance in headache frequency predicted and 27% of | and severity at follow-up (p<0.002) – raw data not presented |  |
|--|--|--|--|--|--|--|---------------------------------------------------------------------------------------------------------------------------|--------------------------------------------|-------------------------------------------------------------------------------------------------------------------------------------------------------------------------------------------------------------------------------------------------------------------------------------------------------------------------------------------------------------------------------------------------------------------------------------|--------------------------------------------------------------|--|

|                                        |              |                  |                                                                                                                                                 |                                                     |                                |                                                                                          |                                                                                                                                                                                       |                                                                                                                                                                        |                                                                                                                                                                                         |     |                      |
|----------------------------------------|--------------|------------------|-------------------------------------------------------------------------------------------------------------------------------------------------|-----------------------------------------------------|--------------------------------|------------------------------------------------------------------------------------------|---------------------------------------------------------------------------------------------------------------------------------------------------------------------------------------|------------------------------------------------------------------------------------------------------------------------------------------------------------------------|-----------------------------------------------------------------------------------------------------------------------------------------------------------------------------------------|-----|----------------------|
|                                        |              |                  |                                                                                                                                                 |                                                     |                                |                                                                                          |                                                                                                                                                                                       |                                                                                                                                                                        | the variance in headache severity predicted by STAIC state scores*                                                                                                                      |     |                      |
| El-Heneedy Y et al, 2019 <sup>27</sup> | Case-control | Tanta, Egypt     | Cases recruited from headache clinic; not reported where controls were recruited from                                                           | N=60 (40 with migraine, 20 controls)                | 11.13 ± 2.85 (range not given) | Not described for whole sample; for migraine group: 23 females (57.5%); 17 males (42.5%) | Migraine diagnosis according to ICHD-III beta criteria                                                                                                                                | Internalizing symptoms measured using the Child Behavior Checklist (CBCL)                                                                                              | There was a significant positive correlation between CBCL anxious-depressed scores and PedMIDAS scores (shown in Figure 1, data not given)                                              | N/A | 5/7 domains adequate |
| Ertem D et al, 2019 <sup>28</sup>      | Case-control | Istanbul, Turkey | Cases recruited from a headache clinic, and hospital controls recruited (patients without neurological disorder diagnosed with any other health | N=238 (115 with migraine, 80 with TTH, 43 controls) | 6-16 years                     | N=130 females (54.6%); 108 males (45.4%)                                                 | 1. Primary headache diagnosis according to ICHD-III beta criteria<br>2. Visual analog scale for headache severity (not clear how it was measured)<br>3. Headache frequency (not clear | 1. Anxiety symptoms measured using the Social Anxiety Scale for Adolescents (SAS-A)<br>2. Depression symptoms measured using the Children's Depression Inventory (CDI) | 1. Anxiety: In the chronic migraine group, SAS-A and headache severity were correlated* (r=0.482, p=0.015)<br>2. Depression: In the episodic migraine group, CDI scores were correlated | N/A | 2/7 domains adequate |

|                                  |                 |                        |                                                     |                                                                                                             |             |                                              |                                                                                                                  |                                                                         |                                                                                                        |                                                                                                                                                                                                                                                        |                       |
|----------------------------------|-----------------|------------------------|-----------------------------------------------------|-------------------------------------------------------------------------------------------------------------|-------------|----------------------------------------------|------------------------------------------------------------------------------------------------------------------|-------------------------------------------------------------------------|--------------------------------------------------------------------------------------------------------|--------------------------------------------------------------------------------------------------------------------------------------------------------------------------------------------------------------------------------------------------------|-----------------------|
|                                  |                 |                        | condition)                                          |                                                                                                             |             |                                              | how it was measured)                                                                                             |                                                                         | with headache severity* (r=0.294, p=0.005)<br>NB. No other significant correlations for migraine group |                                                                                                                                                                                                                                                        |                       |
| Fuh JL et al, 2009 <sup>29</sup> | Cross-sectional | Taitung County, Taiwan | Recruited from community (school-based recruitment) | N=3,963 (928 with migraine or probable migraine, 1,092 with TTH, 445 with other headache, 1498 no headache) | 13-15 years | N=1,923 females (48.5%); 2,040 males (51.5%) | 1. Primary headache diagnosis according to ICHD-II criteria<br>2. Pediatric Migraine Disability Scale (PedMIDAS) | Depression: Ascertained using the Adolescent Depression Inventory (ADI) | N/A                                                                                                    | In the subgroup with migraine or probable migraine (N=928), higher ADI scores were associated with higher odds of moderate-severe disability on the PedMIDAS, after controlling for headache frequency and severity* (OR=3.1, 95% CI=0.7-3.7, p=0.001) | 9/10 domains adequate |
| Gibson J 2004 <sup>31</sup>      | Case-control    | Columbus, USA          | Cases recruited                                     | N=120 (68 with                                                                                              | 6-12 years  | N= 51 females                                | 1. Primary headache                                                                                              | 4. Anxiety: measured                                                    | N/A                                                                                                    | Parent-reported                                                                                                                                                                                                                                        | 3/7 domains           |

|  |                |  |                                                                             |                        |  |                       |                                                                                                                                                                                                                                                             |                                                                                                                                                                                                                                                                                                                                                 |  |                                                                                                                                                                                                                                                                                                                                                                                                                |             |
|--|----------------|--|-----------------------------------------------------------------------------|------------------------|--|-----------------------|-------------------------------------------------------------------------------------------------------------------------------------------------------------------------------------------------------------------------------------------------------------|-------------------------------------------------------------------------------------------------------------------------------------------------------------------------------------------------------------------------------------------------------------------------------------------------------------------------------------------------|--|----------------------------------------------------------------------------------------------------------------------------------------------------------------------------------------------------------------------------------------------------------------------------------------------------------------------------------------------------------------------------------------------------------------|-------------|
|  | (dissertation) |  | from headache clinic, controls recruited from pediatric clinic or community | migraine, 40 controls) |  | (47%); 57 males (53%) | <p>diagnosis according to ICHD criteria</p> <p>2. General quality of life: measured using the Pediatric Quality of Life Inventory (PedsQL)</p> <p>3. Headache-specific quality of life: modified version of the PedsQL with headache-specific questions</p> | <p>using the Revised Children's Manifest Anxiety Scale (RCMAS), and the Child Symptom Inventory -4 (CSI-4)</p> <p>5. Depression: measured using the Children's Depression Inventory, and the Child Symptom Inventory -4 (CSI-4)</p> <p>NB. Those with screening cut-offs or with past psychiatric diagnosis had a follow-up semi-structured</p> |  | <p>headache-specific quality of life was associated with internalizing diagnoses* (F(1,68)=7.377, p&lt;0.05, R<sup>2</sup>=0.071), after controlling for age, sex, race, headache frequency, headache severity and externalizing disorders; no relationship between child-reported headache-specific quality of life and internalizing disorders after controlling for age, sex, race, headache frequency,</p> | ns adequate |
|--|----------------|--|-----------------------------------------------------------------------------|------------------------|--|-----------------------|-------------------------------------------------------------------------------------------------------------------------------------------------------------------------------------------------------------------------------------------------------------|-------------------------------------------------------------------------------------------------------------------------------------------------------------------------------------------------------------------------------------------------------------------------------------------------------------------------------------------------|--|----------------------------------------------------------------------------------------------------------------------------------------------------------------------------------------------------------------------------------------------------------------------------------------------------------------------------------------------------------------------------------------------------------------|-------------|

|  |  |  |  |  |  |  |  |                                                                                                    |  |                                                                                                                                                                                                                                                                                                                                                                                                                                                |
|--|--|--|--|--|--|--|--|----------------------------------------------------------------------------------------------------|--|------------------------------------------------------------------------------------------------------------------------------------------------------------------------------------------------------------------------------------------------------------------------------------------------------------------------------------------------------------------------------------------------------------------------------------------------|
|  |  |  |  |  |  |  |  | <p>interview with parents using DSM-IV diagnostic criteria (Barkley &amp; Murphy, 1998 method)</p> |  | <p>headache severity and externalizing disorders; internalizing disorders were correlated with headache frequency *(<math>r=0.229</math>, <math>p&lt;0.05</math>) after controlling for age, sex, race, headache frequency, headache severity and externalizing disorders; no relationship between internalizing disorders and headache-related impairment after controlling for age, sex, race, headache frequency, headache severity and</p> |
|--|--|--|--|--|--|--|--|----------------------------------------------------------------------------------------------------|--|------------------------------------------------------------------------------------------------------------------------------------------------------------------------------------------------------------------------------------------------------------------------------------------------------------------------------------------------------------------------------------------------------------------------------------------------|

|                                      |              |             |                                                                     |                                       |            |                                    |                                                       |                                                                                                                                                                                    |                                                                                                                                                                                                                               |                                                                                                                                                                                                               |                      |
|--------------------------------------|--------------|-------------|---------------------------------------------------------------------|---------------------------------------|------------|------------------------------------|-------------------------------------------------------|------------------------------------------------------------------------------------------------------------------------------------------------------------------------------------|-------------------------------------------------------------------------------------------------------------------------------------------------------------------------------------------------------------------------------|---------------------------------------------------------------------------------------------------------------------------------------------------------------------------------------------------------------|----------------------|
|                                      |              |             |                                                                     |                                       |            |                                    |                                                       |                                                                                                                                                                                    |                                                                                                                                                                                                                               | externalizing disorders; no significant relationships between parent- or child-reported PedsQL scores after controlling for age, sex, race, headache frequency, headache severity and externalizing disorders |                      |
| Guidetti V et al, 1998 <sup>36</sup> | Cohort study | Rome, Italy | Cases randomly selected from a clinical cohort in a headache clinic | N=100 (64 with migraine, 36 with TTH) | 4-18 years | N=60 females (60%); 40 males (40%) | Primary headache diagnosis according to ICHD criteria | 1. Baseline (1988): Psychologists performed structured clinical interviews using DSM-II-R criteria; anxiety was also measured using the State-Trait Anxiety Inventory for Children | Anxiety disorders at baseline (1988) were predictive of persistence of headache at 8-year follow-up* (1996) (chi square=21.72, df=8, p<0.05); single comorbid disorders were related to headache persistence only in migraine | N/A                                                                                                                                                                                                           | 5/8 domains adequate |

|                                     |                 |             |                                      |                                         |             |                        |                                                                                                                           |                                                                                                                                                                                                                                           |                                                |                                                                                                                                          |                       |
|-------------------------------------|-----------------|-------------|--------------------------------------|-----------------------------------------|-------------|------------------------|---------------------------------------------------------------------------------------------------------------------------|-------------------------------------------------------------------------------------------------------------------------------------------------------------------------------------------------------------------------------------------|------------------------------------------------|------------------------------------------------------------------------------------------------------------------------------------------|-----------------------|
|                                     |                 |             |                                      |                                         |             |                        |                                                                                                                           | (STAIC), and parent-reported anxiety and depression were measured using the Revised Personality Inventory for Children (PIC-R)<br>2. 8 year follow-up (1996): Psychologists administered the Structured Clinical Interview for DSM (SCID) | group; no association for depressive disorders |                                                                                                                                          |                       |
| Kaczynski et al, 2013 <sup>46</sup> | Cross-sectional | Boston, USA | Cases recruited from headache clinic | N=262 (109 with migraine, 153 with TTH) | 11-17 years | N=179 females (68.5%); | 1. Primary headache diagnosis according to ICHD-II criteria<br>2. School functioning measured by the Pediatric Quality of | 1. Anxiety: measured using the Revised Children's Manifest Anxiety Scale (RCMAS)<br>2. Depression: measured using the                                                                                                                     | N/A                                            | In linear regression model, depressive symptoms were significantly associated with school functioning in migraine group ( $\beta=0.28$ , | 6/10 domains adequate |



|                                   |                 |     |                                                              |          |            |                                           |                                                                           |                                                                                       |                                                                                         |                                                                                                                                                                                                                                                                                                                                     |                       |
|-----------------------------------|-----------------|-----|--------------------------------------------------------------|----------|------------|-------------------------------------------|---------------------------------------------------------------------------|---------------------------------------------------------------------------------------|-----------------------------------------------------------------------------------------|-------------------------------------------------------------------------------------------------------------------------------------------------------------------------------------------------------------------------------------------------------------------------------------------------------------------------------------|-----------------------|
|                                   |                 |     |                                                              |          |            |                                           | Life School Functioning Scale                                             | Children's Depression Inventory (CDI)                                                 |                                                                                         | p<0.05), while controlling for age, headache frequency, duration and severity, anxiety, protective parenting and passive coping; anxiety symptoms were not significantly associated with school functioning, while controlling for age, headache frequency, duration and severity, anxiety, protective parenting and passive coping |                       |
| Kafle M et al, 2022 <sup>47</sup> | Cross-sectional | USA | Cases of migraine who were hospitalized in different centers | N=21,436 | 6-18 years | N=15,419 females (72%), 6,017 males (28%) | Migraine diagnosis according to International Classification of Diseases, | Psychiatric diagnoses ascertained using the International Classification of Diseases, | Having any psychiatric comorbidity was associated with a higher likelihood of receiving | After controlling for demographic variables, the differences                                                                                                                                                                                                                                                                        | 8/10 domains adequate |

|                                      |                                   |                                    |                                                                                                                      |                    |            |                                       |                                                  |                                                                                                                                                                           |                                                                                                                                                                              |                                                                                                                                                                                      |                       |
|--------------------------------------|-----------------------------------|------------------------------------|----------------------------------------------------------------------------------------------------------------------|--------------------|------------|---------------------------------------|--------------------------------------------------|---------------------------------------------------------------------------------------------------------------------------------------------------------------------------|------------------------------------------------------------------------------------------------------------------------------------------------------------------------------|--------------------------------------------------------------------------------------------------------------------------------------------------------------------------------------|-----------------------|
|                                      |                                   |                                    | for migraine management identified in an administrative health database (Pediatric Health Information System – PHIS) |                    |            |                                       | 9 <sup>th</sup> and 10 <sup>th</sup> editions    | 9 <sup>th</sup> and 10 <sup>th</sup> editions                                                                                                                             | medication treatment (see Table 1 in manuscript), with a longer mean length of stay (2.6 vs. 2.0 days, p<0.001), and with higher admission costs (8,749 vs. 7,040, p<0.001)* | between those with vs. without psychiatric comorbidities were still significant                                                                                                      |                       |
| Karlson CW et al, 2013 <sup>97</sup> | Cross-sectional daily diary study | Multicenter (Kansas and Ohio, USA) | Cases recruited from neurology or headache clinics (3 centers involved)                                              | N=69 with migraine | 7-12 years | N= 50 female (72.5%); 19 male (27.5%) | Migraine diagnosis according to ICHD-II criteria | Parents completed the Child Behavior Checklist (CBCL) and daily headache diaries were completed which included a daily mood rating using the Facial Affective Scale (FAS) | Baseline: Parents reported normal behavioral functioning on CBCL (subscale scores not reported)                                                                              | 1. Daily data – same day: Worse mood reported on headache days* (M=0.5 ±0.2 vs. 0.8 ±0.2; t(909)=17.81, p<0.001); worse mood associated with same-day headache occurrence* (t(883)=- | 6/10 domains adequate |

|  |  |  |  |  |  |  |  |  |  |                                                                                                                                                                                                                                                                                                                                                                                                                                                                                             |
|--|--|--|--|--|--|--|--|--|--|---------------------------------------------------------------------------------------------------------------------------------------------------------------------------------------------------------------------------------------------------------------------------------------------------------------------------------------------------------------------------------------------------------------------------------------------------------------------------------------------|
|  |  |  |  |  |  |  |  |  |  | 8.75,<br>$p < 0.001$ ,<br>longer<br>headache<br>duration*<br>( $z = -9.07$ ,<br>$p < 0.001$ ),<br>and more<br>severe<br>headache<br>* ( $z = -$<br>19.05,<br>$p < 0.001$<br>2. Daily<br>data –<br>next day:<br>Mood<br>associated<br>with next<br>day<br>headache<br>severity*<br>( $z = 2.11$ ,<br>$p = 0.04$ ),<br>but not<br>next-day<br>headache<br>occurrence,<br>or next<br>day<br>headache<br>duration;<br>neither<br>headache<br>occurrence,<br>duration<br>nor<br>severity<br>were |
|--|--|--|--|--|--|--|--|--|--|---------------------------------------------------------------------------------------------------------------------------------------------------------------------------------------------------------------------------------------------------------------------------------------------------------------------------------------------------------------------------------------------------------------------------------------------------------------------------------------------|

|                                        |                            |                 |                                               |                                |                                      |                                              |                                                                                         |                                                                                                                                                            |                                                                                                                                                               |                                                                                                                                                           |                       |
|----------------------------------------|----------------------------|-----------------|-----------------------------------------------|--------------------------------|--------------------------------------|----------------------------------------------|-----------------------------------------------------------------------------------------|------------------------------------------------------------------------------------------------------------------------------------------------------------|---------------------------------------------------------------------------------------------------------------------------------------------------------------|-----------------------------------------------------------------------------------------------------------------------------------------------------------|-----------------------|
|                                        |                            |                 |                                               |                                |                                      |                                              |                                                                                         |                                                                                                                                                            |                                                                                                                                                               | associated with next day mood<br>NB. All of these analyses controlled for age, gender, quality of life, and headache-related disability (PedMIDAS scores) |                       |
| Nesterovskiy et al, 2015 <sup>64</sup> | Cross-sectional (abstract) | Moscow, Russia  | Not reported                                  | N=187 with migraine            | 7-16 years                           | Not reported                                 | Migraine diagnosis according to ICHD-II criteria                                        | Anxiety disorders diagnosed according to ICD-10 diagnostic criteria, and severity of anxiety symptoms ascertained with the Spence Children's Anxiety Scale | Those with migraine and comorbid anxiety disorders have higher attack frequency than those without comorbid anxiety disorders (4.8 ±2.3 vs. 2.1 ±1.8, p<0.01) | N/A                                                                                                                                                       | 2/10 domains adequate |
| Orr SL et al, 2019 <sup>98</sup>       | Cohort                     | Cincinnati, USA | Migraine cases recruited from headache clinic | N=5,316 (N=13,160 visit pairs) | 13.4 ±3.7 years (range not reported) | N=3,586 females (67.5%); 1,730 males (32.5%) | 1. Migraine diagnosis according to ICHD criteria<br>2. Clinical worsening defined as an | 1. Depression: Ascertain using a single unvalidated question<br>2. Anxiety: Ascertain                                                                      | 1. Depression: 16.9% (N=885) of the sample reported feeling depressed; in                                                                                     | 1. Depression was associated with a higher odds of clinical worsening, after                                                                              | 4/8 domains adequate  |

|  |  |  |  |  |  |  |                                                                           |                                                                                                                                          |                                                                                                                                                                                                                                                                                                                                         |                                                                                                                                                                                                                                                                        |
|--|--|--|--|--|--|--|---------------------------------------------------------------------------|------------------------------------------------------------------------------------------------------------------------------------------|-----------------------------------------------------------------------------------------------------------------------------------------------------------------------------------------------------------------------------------------------------------------------------------------------------------------------------------------|------------------------------------------------------------------------------------------------------------------------------------------------------------------------------------------------------------------------------------------------------------------------|
|  |  |  |  |  |  |  | increase in 4 or more headache days/month in a 1-3 month follow-up window | d using unvalidated questions (endorsing any of the following: feeling anxious, feelings of low self-esteem, worrying a lot, or shyness) | univariate logistic regression models, depression was associated with a higher odds of clinical worsening* (OR=1.28, 95% CI=1.13-1.47, p=0.0004)<br>2. Anxiety: 45.8% (N=2,400) reported some anxiety symptoms; in univariate logistic regression models, anxiety was associated with a higher odds of clinical worsening (OR=1.17, 95% | adjusting for age, sex, disability score, and a variety of other predictors* (OR=1.31, 95% CI=1.13-1.51, p=0.0003)<br>2. Anxiety was not associated with odds of clinical worsening, after adjusting for age, sex, disability score, and a variety of other predictors |
|--|--|--|--|--|--|--|---------------------------------------------------------------------------|------------------------------------------------------------------------------------------------------------------------------------------|-----------------------------------------------------------------------------------------------------------------------------------------------------------------------------------------------------------------------------------------------------------------------------------------------------------------------------------------|------------------------------------------------------------------------------------------------------------------------------------------------------------------------------------------------------------------------------------------------------------------------|

|                                   |              |                               |                                                                                         |                                          |            |                                        |                                                                                                                  |                                                                                                                                                                                                                                                                                              |                                                                                                                                                                                                                       |     |                      |
|-----------------------------------|--------------|-------------------------------|-----------------------------------------------------------------------------------------|------------------------------------------|------------|----------------------------------------|------------------------------------------------------------------------------------------------------------------|----------------------------------------------------------------------------------------------------------------------------------------------------------------------------------------------------------------------------------------------------------------------------------------------|-----------------------------------------------------------------------------------------------------------------------------------------------------------------------------------------------------------------------|-----|----------------------|
|                                   |              |                               |                                                                                         |                                          |            |                                        |                                                                                                                  |                                                                                                                                                                                                                                                                                              | CI=1.05-1.30, p=0.0066)                                                                                                                                                                                               |     |                      |
| Oztop D et al, 2016 <sup>68</sup> | Case-control | Turkey (details not specific) | Migraine cases recruited from neurology clinic; cases were recruited from local schools | N=70 (N=35 with migraine, N=35 controls) | 9-16 years | N=52 (74.3%) females, 18 (25.7%) males | 1. Migraine diagnosis according to ICHD criteria<br>2. Pediatric Migraine Disability Assessment Scale (PedMIDAS) | 1. Depression: Ascertain ed using Kiddie – Schedule for Affective Disorders and Schizophr enia for School Aged Children (Kiddie-SADS) and Kovacs Children Depression Inventory (Kovacs-CDI)<br>2. Anxiety: Ascertain ed using Kiddie-SADS, State-Trait Anxiety Inventory for Children (STAI) | Kovacs CDI scores were positively correlated with Pediatric Migraine Disability Assessment Scale (PedMIDAS) scores* (p=0.022); did not report on whether or not anxiety symptoms were associated with PedMIDAS scores | N/A | 4/7 domains adequate |

|                                       |                 |               |                                                                                                          |                                               |            |                                                                                                          |                                                                           |                                                                                                                                                                                       |                                                                                                                                                                                                                |     |                       |
|---------------------------------------|-----------------|---------------|----------------------------------------------------------------------------------------------------------|-----------------------------------------------|------------|----------------------------------------------------------------------------------------------------------|---------------------------------------------------------------------------|---------------------------------------------------------------------------------------------------------------------------------------------------------------------------------------|----------------------------------------------------------------------------------------------------------------------------------------------------------------------------------------------------------------|-----|-----------------------|
|                                       |                 |               |                                                                                                          |                                               |            |                                                                                                          |                                                                           | for those <12yo, and Spielberg State-Trait Anxiety Inventory for >12yo                                                                                                                |                                                                                                                                                                                                                |     |                       |
| Pakalnis A et al, 2005 <sup>69</sup>  | Case-control    | Columbus, USA | Cases recruited from headache clinic, controls recruited from pediatric clinics during routine physicals | N=80 (47 with episodic migraine, 33 controls) | 6-17 years | N=21 females with migraine (44.6% of migraine sample), 26 males with migraine (55.3% of migraine sample) | 1. Migraine diagnosis according to ICHD criteria<br>2. Treatment response | Child Symptom Inventory (CSI-4) or Adolescent Symptom Inventory (ASI-4); those with high scores had semi-structured interview with psychologist using Barkley & Murphy 1988 interview | Prognosis at 3 months: Treatment response not different comparing those with comorbidity vs. those without (results not presented, unclear if depression and anxiety analyzed separately from other disorders) | N/A | 4/7 domains adequate  |
| Tarantino S et al, 2013 <sup>99</sup> | Cross-sectional | Rome, Italy   | Cases recruited from a headache clinic                                                                   | N=62 with migraine without aura               | 8-16 years | N=33 females (53.2%); 29 males (46.8%)                                                                   | Migraine without aura diagnosis according to ICHD-II criteria             | Anxiety measured using the Self-Administered Psychiatric Scales for Children and Adolescents (SAFA)                                                                                   | Participants with low frequency of attacks (< 4 attacks/month) had higher SAFA separation anxiety scores than those with chronic                                                                               | N/A | 6/10 domains adequate |

|                                        |                            |             |                                         |                                  |                                                |                                        |                                                   |                                                                                                                               |                                                                                                                                                                                                                           |     |                       |
|----------------------------------------|----------------------------|-------------|-----------------------------------------|----------------------------------|------------------------------------------------|----------------------------------------|---------------------------------------------------|-------------------------------------------------------------------------------------------------------------------------------|---------------------------------------------------------------------------------------------------------------------------------------------------------------------------------------------------------------------------|-----|-----------------------|
|                                        |                            |             |                                         |                                  |                                                |                                        |                                                   |                                                                                                                               | migraine ( $\geq 15$ attacks/month) group* (9.4 $\pm$ 5.0 vs. 3.3 $\pm$ 3.5, p=0.003)                                                                                                                                     |     |                       |
| Tarantino S et al, 2019 <sup>100</sup> | Cross-sectional (abstract) | Rome, Italy | Unclear where cases were recruited from | N=51 with migraine               | Mean age=11.6 $\pm$ 2.1 years (no range given) | N=29 females (56.9%); 22 males (43.1%) | Not reported                                      | Anxiety measured using the Self-Administered Psychiatric Scales for Children and Adolescents (SAFA)                           | There was no relationship between SAFA score and migraine frequency (no data given)                                                                                                                                       | N/A | 3/10 domains adequate |
| Tarantino S et al, 2020 <sup>101</sup> | Cross-sectional            | Rome, Italy | Case recruited from headache clinic     | N=111 with migraine without aura | 8-18 years                                     | N=64 females (57.6%); 47 males (42.3%) | Migraine diagnosis according to ICHD-III criteria | Self-Administered Psychiatric Scales for Children and Adolescents (SAFA) used to measure both anxiety and depressive symptoms | 1. Depression: Mean SAFA total depression score higher in high frequency migraine group (weekly-daily attacks) vs. low frequency migraine group ( $\leq 3$ attacks/month) (31.7 $\pm$ 19.5 vs. 24.3 $\pm$ 15.2, p=0.042)* | N/A | 5/10 domains adequate |



|                                         |              |              |                                                                                            |                                                   |             |                                      |                                                                                                                                                                   |                                                                                                                                                                          |                                                                                                                                                                                                                   |     |                      |
|-----------------------------------------|--------------|--------------|--------------------------------------------------------------------------------------------|---------------------------------------------------|-------------|--------------------------------------|-------------------------------------------------------------------------------------------------------------------------------------------------------------------|--------------------------------------------------------------------------------------------------------------------------------------------------------------------------|-------------------------------------------------------------------------------------------------------------------------------------------------------------------------------------------------------------------|-----|----------------------|
|                                         |              |              |                                                                                            |                                                   |             |                                      |                                                                                                                                                                   |                                                                                                                                                                          | 2. Anxiety: Mean SAFA generalized anxiety score higher in high frequency migraine group vs. low frequency migraine group (11.3 ±5.8 vs. 7.4 ±4.7, p=0.000)*                                                       |     |                      |
| Uyar Cankay T et al, 2021 <sup>83</sup> | Case-control | Rize, Turkey | Cases recruited from neurology clinic, controls recruited from community (classroom peers) | N=100 (N=50 with chronic migraine, N=50 controls) | 12-18 years | N=78 females (78%); N=22 males (22%) | 1. Chronic migraine (CM) diagnosis according to ICHD-III criteria<br>2. Visual analog scale<br>3. Pediatric Migraine Disability Assessment Scale (PedMIDAS) score | 1. Psychiatric diagnoses ascertained using Kiddie – Schedule for Affective Disorders and Schizophrenia for School Aged Children (Kiddie-SADS)<br>2. Psychiatric symptoms | There was no correlation between CCSM-V anxiety symptoms (r=-0.081, p=0.575) nor between CCSM-V depression symptoms (r=0.152, p=0.292) and VAS scores; there was no correlation between CCSM-V anxiety scores and | N/A | 6/7 domains adequate |

|                                      |              |           |                                                                       |                                          |            |                                         |                                                                                                                                                                                         |                                                                                                                                                                                                         |                                                                                                                                                                                                                                                                                                          |     |                      |
|--------------------------------------|--------------|-----------|-----------------------------------------------------------------------|------------------------------------------|------------|-----------------------------------------|-----------------------------------------------------------------------------------------------------------------------------------------------------------------------------------------|---------------------------------------------------------------------------------------------------------------------------------------------------------------------------------------------------------|----------------------------------------------------------------------------------------------------------------------------------------------------------------------------------------------------------------------------------------------------------------------------------------------------------|-----|----------------------|
|                                      |              |           |                                                                       |                                          |            |                                         |                                                                                                                                                                                         | measured using the DSM-V Level 1 Cross-Cutting Symptom Measure (CCSM-5) and clinical cut-offs used                                                                                                      | PedMIDAS scores (r=0.018, p=0.903), nor between CCSM-V depression symptoms and PedMIDAS (r=0.112, p=0.438)                                                                                                                                                                                               |     |                      |
| Vannatta K et al, 2008 <sup>85</sup> | Case-control | Ohio, USA | Cases recruited from headache clinic; controls recruited from schools | N=93 (N=47 with migraine; N=46 controls) | 8-14 years | N= 42 females (45.2%); 51 males (54.8%) | <ol style="list-style-type: none"> <li>1. Migraine diagnosis according to ICHD-II criteria</li> <li>2. Headache frequency and severity at follow-up (average 3 month follow)</li> </ol> | <ol style="list-style-type: none"> <li>3. Internalizing: Measured using the Child Behavior Checklist (CBCL)</li> <li>3. Depression: Measured using the Children's Depression Inventory (CDI)</li> </ol> | <ol style="list-style-type: none"> <li>1. Internalizing: Higher mother-reported internalizing CBCL scores were associated with higher headache frequency at follow-up* (r=0.45, p&lt;0.05); higher father-reported CBCL internalizing scores were associated with higher headache severity at</li> </ol> | N/A | 5/7 domains adequate |

|  |  |  |  |  |  |  |  |  |                                                                                                                                                                                                    |  |
|--|--|--|--|--|--|--|--|--|----------------------------------------------------------------------------------------------------------------------------------------------------------------------------------------------------|--|
|  |  |  |  |  |  |  |  |  | follow-up*<br>(r=0.42,<br>p<0.05)<br>2. Higher<br>baseline<br>CDI scores<br>were<br>correlated<br>to higher<br>headache<br>frequency<br>scores at<br>clinical<br>follow-up*<br>(r=0.47,<br>p<0.05) |  |
|--|--|--|--|--|--|--|--|--|----------------------------------------------------------------------------------------------------------------------------------------------------------------------------------------------------|--|

\*Statistically significant

NB. ICHD = International Classification of Headache Disorders; ICD = International Classification of Disease; TTH = tension-type headache; DSM = Diagnostic and Statistical Manual of Mental Disorders

**eTable 3. Summary of studies examining migraine incidence (n=2)**

| Study                               | Design | Location | Setting          | Sample size                  | Ages        | Sex                                          | Outcome                                                                                                               | Exposure                                                                                                    | Unadjusted results                                                                                                                                                                                                                                                                                                                                                                                                     | Adjusted results                                                                                                                                                                                                                                     | Quality              |
|-------------------------------------|--------|----------|------------------|------------------------------|-------------|----------------------------------------------|-----------------------------------------------------------------------------------------------------------------------|-------------------------------------------------------------------------------------------------------------|------------------------------------------------------------------------------------------------------------------------------------------------------------------------------------------------------------------------------------------------------------------------------------------------------------------------------------------------------------------------------------------------------------------------|------------------------------------------------------------------------------------------------------------------------------------------------------------------------------------------------------------------------------------------------------|----------------------|
| Hammond N et al, 2019 <sup>40</sup> | Cohort | Canada   | Population-based | N=2,313 (3.1% with migraine) | 14-15 years | N=1,182 females (51.1%); 1,131 males (48.9%) | Migraine ascertained by person most knowledgeable reported health professional diagnosed migraine in their adolescent | Depression and separation anxiety symptoms measured using Ontario Child Health Study scale at age 8-9 years | Symptoms of depression and anxiety at 8-9 years significantly mediated the association between early life stress from ages 0-5 years and incident migraine at 14-15 years (family dysfunction IE= 0.0209, 95% bias-corrected confidence interval-CI <sub>BC</sub> =0.0014-0.0609; hostile parenting IE=0.0581, 95% CI <sub>BC</sub> =0.0033-0.1238; punitive parenting IE=0.0271, 95% CI <sub>BC</sub> =0.0036-0.0670; | Symptoms of depression and anxiety no longer significantly mediated the association between family dysfunction from ages 0-5 years and incident migraine at 14-15 years after adjustment for sex, parental migraine status, and socioeconomic status | 6/8 domains adequate |

|                                  |        |                        |                                                     |                                                                                                                                                                                                                                           |             |                                              |                                                                                                                              |                                                                                                                                                                                                                                                                                                                                                                                                                                   |                                                                                                                                            |                                                                                                                                                                                                                                                                                                                                         |                      |
|----------------------------------|--------|------------------------|-----------------------------------------------------|-------------------------------------------------------------------------------------------------------------------------------------------------------------------------------------------------------------------------------------------|-------------|----------------------------------------------|------------------------------------------------------------------------------------------------------------------------------|-----------------------------------------------------------------------------------------------------------------------------------------------------------------------------------------------------------------------------------------------------------------------------------------------------------------------------------------------------------------------------------------------------------------------------------|--------------------------------------------------------------------------------------------------------------------------------------------|-----------------------------------------------------------------------------------------------------------------------------------------------------------------------------------------------------------------------------------------------------------------------------------------------------------------------------------------|----------------------|
|                                  |        |                        |                                                     |                                                                                                                                                                                                                                           |             |                                              |                                                                                                                              |                                                                                                                                                                                                                                                                                                                                                                                                                                   | parental depression<br>IE=0.0443,<br>95%<br>CIBC=0.004<br>9-0.0883)                                                                        |                                                                                                                                                                                                                                                                                                                                         |                      |
| Lu SR et al, 2013 <sup>102</sup> | Cohort | Taitung County, Taiwan | Recruited from community (school-based recruitment) | N= 3,342 adolescents without chronic daily headache at baseline; total of 5,585 person-years of follow-up (94.3% had ≥1 annual follow-up); 63 cases of incident chronic daily headache, 37 (58.7%) of which had incident chronic migraine | 13-14 years | N=1,641 females (49.1%); 1,701 males (50.9%) | Incidence of chronic daily headache at 1- or 2-year follow-up; diagnostic subgroups classified according to ICHD-II criteria | 1. Depression: depressive disorders ascertained using the Adolescent Depression Inventory (ADI) with clinical cut-off and using the Mini-International Neuropsychiatric Interview for Children and Adolescents (MINI-Kid, version 1.01) administered by a psychiatrist<br>2. Anxiety: anxiety disorders ascertained using the Mini-International Neuropsychiatric Interview for Children and Adolescents (MINI-Kid, version 1.01) | Depression (ADI score above cut-off) was associated with increased risk of incident chronic migraine* (RR=4.32, 95% CI=2.11-8.86, p<0.001) | Depression (ADI score above cut-off) was associated with increased hazard of incident chronic migraine* (HR=2.47, 95% CI=1.08-5.62, p=0.032), with model that included the following covariates: migraine or probable migraine at baseline, baseline headache frequency ≥7 days/month, obesity and lower household socioeconomic status | 7/8 domains adequate |

|  |  |  |  |  |  |  |  |                                      |  |  |  |
|--|--|--|--|--|--|--|--|--------------------------------------|--|--|--|
|  |  |  |  |  |  |  |  | administered<br>by a<br>psychiatrist |  |  |  |
|--|--|--|--|--|--|--|--|--------------------------------------|--|--|--|

\*Statistically significant

**eTable 4. Risk of bias ratings for case-control studies**

| <i>Study</i>                           | <b>Meta-analyzed</b> |                         |                   |                      |                            |                        |                                             | <i>Total (out of 7 domains)</i> |
|----------------------------------------|----------------------|-------------------------|-------------------|----------------------|----------------------------|------------------------|---------------------------------------------|---------------------------------|
|                                        | <i>Selection</i>     |                         |                   | <i>Comparability</i> |                            | <i>Exposure</i>        |                                             |                                 |
|                                        | Case definition      | Case representativeness | Control selection | Control definition   | Case-control comparability | Exposure ascertainment | Same ascertainment method case and controls |                                 |
| Açkel B et al, 2021 <sup>22</sup>      | ★                    | -                       | ★                 | ★                    | ★                          | ★                      | ★                                           | 6                               |
| Araujo G et al, 2020 <sup>56</sup>     | -                    | -                       | -                 | ★                    | -                          | ★                      | ★                                           | 3                               |
| Cooper P et al, 1987 <sup>95</sup>     | ★                    | ★                       | -                 | ★                    | ★                          | -                      | ★                                           | 5                               |
| D'Andrea G et al, 1989 <sup>25</sup>   | ★                    | -                       | -                 | ★                    | ★                          | ★                      | ★                                           | 5                               |
| El-Heneedy Y et al, 2019 <sup>27</sup> | ★                    | -                       | -                 | ★                    | ★                          | ★                      | ★                                           | 5                               |
| Ertem D et al, 2019 <sup>28</sup>      | ★                    | -                       | -                 | -                    | ★                          | -                      | -                                           | 2                               |
| Galli F et al, 2007 <sup>30</sup>      | ★                    | ★                       | ★                 | ★                    | -                          | ★                      | ★                                           | 6                               |
| Gibson J 2004 <sup>31</sup>            | ★                    | -                       | -                 | ★                    | -                          | ★                      | ★                                           | 4                               |

|                                            |   |   |   |   |   |   |   |   |
|--------------------------------------------|---|---|---|---|---|---|---|---|
| Gozubatik-Celik et al, 2021 <sup>33</sup>  | ★ | - | ★ | ★ | ★ | ★ | ★ | 6 |
| Kandemir et al, 2018 <sup>48</sup>         | ★ | ★ | - | ★ | ★ | ★ | ★ | 6 |
| Machnes-Maayan D et al, 2014 <sup>55</sup> | ★ | - | - | ★ | ★ | - | ★ | 4 |
| Marates J et al, 1982 <sup>60</sup>        | ★ | ★ | - | ★ | - | - | ★ | 4 |
| Mazzone L et al, 2006 <sup>61</sup>        | ★ | - | ★ | ★ | - | ★ | ★ | 5 |
| Nardello R et al, 2014 <sup>63</sup>       | ★ | - | ★ | - | ★ | ★ | ★ | 5 |
| Nita S et al, 2020 <sup>65</sup>           | ★ | - | - | ★ | - | ★ | ★ | 4 |
| Oztop D et al, 2016 <sup>68</sup>          | ★ | - | - | ★ | ★ | - | ★ | 4 |
| Pakalnis A et al, 2005 <sup>69</sup>       | ★ | ★ | ★ | - | - | - | ★ | 4 |
| Pavone P et al, 2012 <sup>71</sup>         | ★ | ★ | - | ★ | ★ | ★ | ★ | 6 |
| Reale L et al, 2011 <sup>73</sup>          | ★ | - | ★ | ★ | - | ★ | ★ | 5 |
| Salerno M et al, 2017 <sup>76</sup>        | ★ | ★ | - | - | ★ | ★ | ★ | 5 |
| Salvadori F et al, 2007 <sup>77</sup>      | ★ | ★ | ★ | ★ | ★ | ★ | ★ | 7 |
| Smith M et al, 2003 <sup>79</sup>          | - | ★ | ★ | - | ★ | ★ | ★ | 5 |
| Uçar H et al, 2020 <sup>82</sup>           | ★ | ★ | - | ★ | ★ | ★ | ★ | 6 |
| Uyar Cankay T et al, 2021 <sup>83</sup>    | ★ | - | ★ | ★ | ★ | ★ | ★ | 6 |
| Valeriani M et al, 2009 <sup>84</sup>      | ★ | ★ | - | - | - | ★ | ★ | 4 |

| Vannatta K et al, 2008 <sup>85</sup>   | ★                | -                       | ★                 | -                  | ★                          | ★                      | ★                                           | 5                               |
|----------------------------------------|------------------|-------------------------|-------------------|--------------------|----------------------------|------------------------|---------------------------------------------|---------------------------------|
| Wagner J et al, 2014 <sup>86</sup>     | -                | ★                       | -                 | -                  | -                          | ★                      | ★                                           | 3                               |
| Williams R et al, 2017 <sup>92</sup>   | ★                | ★                       | ★                 | ★                  | ★                          | ★                      | ★                                           | 7                               |
| <b>Not fully meta-analyzed</b>         |                  |                         |                   |                    |                            |                        |                                             |                                 |
| <i>Study</i>                           | <i>Selection</i> |                         |                   |                    | <i>Comparability</i>       | <i>Exposure</i>        |                                             | <i>Total (out of 7 domains)</i> |
|                                        | Case definition  | Case representativeness | Control selection | Control definition | Case-control comparability | Exposure ascertainment | Same ascertainment method case and controls |                                 |
| Andrasik F et al, 1988 <sup>34</sup>   | ★                | -                       | -                 | ★                  | ★                          | ★                      | -                                           | 4                               |
| Araujo G et al, 2020 <sup>56</sup>     | -                | -                       | -                 | ★                  | -                          | ★                      | ★                                           | 3                               |
| Cooper P et al, 1987 <sup>95</sup>     | ★                | ★                       | -                 | ★                  | ★                          | -                      | ★                                           | 5                               |
| Cunningham S et al, 1987 <sup>24</sup> | -                | -                       | -                 | ★                  | ★                          | ★                      | -                                           | 3                               |
| Gibson J 2004 <sup>31</sup>            | ★                | -                       | -                 | ★                  | -                          | ★                      | ★                                           | 4                               |
| Guidetti V et al, 1987 <sup>35</sup>   | ★                | -                       | ★                 | -                  | -                          | -                      | ★                                           | 3                               |
| Guidetti V et al, 2013 <sup>37</sup>   | -                | -                       | -                 | ★                  | -                          | -                      | ★                                           | 2                               |
| Gunalan S et al, 2012 <sup>39</sup>    | -                | -                       | ★                 | ★                  | -                          | ★                      | ★                                           | 4                               |
| Huss et al, 2008 <sup>43</sup>         | ★                | -                       | ★                 | ★                  | -                          | -                      | ★                                           | 4                               |
| Just U et al, 2003 <sup>44</sup>       | ★                | ★                       | ★                 | -                  | ★                          | -                      | ★                                           | 5                               |
| Mar S et al, 2009 <sup>58</sup>        | ★                | -                       | -                 | -                  | -                          | ★                      | ★                                           | 3                               |
| Mar S et al, 2010 <sup>59</sup>        | -                | -                       | -                 | -                  | ★                          | -                      | ★                                           | 2                               |



|                                       |   |   |   |   |   |   |   |   |
|---------------------------------------|---|---|---|---|---|---|---|---|
| Nita S et al, 2020 <sup>65</sup>      | ★ | - | - | ★ | - | ★ | ★ | 4 |
| Oztop D et al, 2016 <sup>68</sup>     | ★ | - | - | ★ | ★ | - | ★ | 4 |
| Pakalnis A et al, 2009 <sup>70</sup>  | ★ | - | - | ★ | - | ★ | ★ | 4 |
| Tereschenko et al, 2017 <sup>80</sup> | - | - | - | ★ | ★ | - | ★ | 3 |
| Yilmaz et al, 2017 <sup>93</sup>      | - | - | - | - | - | ★ | ★ | 2 |

★ = domain satisfies quality requirement

- = domain does not satisfy quality requirement

**eTable 5. Risk of bias ratings for cross-sectional studies**

| <i>Study</i>                                          | <b>Meta-analyzed</b>     |                                    |                            |                    |                         |             |               |                        |                           |                   |                                  |
|-------------------------------------------------------|--------------------------|------------------------------------|----------------------------|--------------------|-------------------------|-------------|---------------|------------------------|---------------------------|-------------------|----------------------------------|
|                                                       | <i>Study Methods</i>     |                                    |                            | <i>Selection</i>   |                         |             |               | <i>Exposure</i>        | <i>Applicability</i>      |                   | <i>Total (out of 10 domains)</i> |
|                                                       | Design & sampling method | Report of estimates (CI, subgroup) | Adjustment for confounders | Outcome definition | Case representativeness | Sample size | Response rate | Exposure ascertainment | Study subject description | External validity |                                  |
| Albanês Oliveira Bernardo A et al, 2020 <sup>23</sup> | ★                        | -                                  | -                          | ★                  | ★                       | -           | -             | ★                      | ★                         | -                 | 5                                |
| Anttila P et al, 2004 <sup>45</sup>                   | ★                        | ★                                  | ★                          | ★                  | ★                       | ★           | ★             | ★                      | ★                         | -                 | 9                                |
| Arruda M et al, 2012 <sup>67</sup>                    | ★                        | ★                                  | ★                          | ★                  | ★                       | ★           | ★             | ★                      | ★                         | -                 | 9                                |
| Bektas Ö et al, 2015 <sup>78</sup>                    | ★                        | ★                                  | ★                          | ★                  | ★                       | ★           | ★             | ★                      | ★                         | -                 | 9                                |
| Blaauw B et al, 2014 <sup>89</sup> (12-14 years old)  | ★                        | ★                                  | ★                          | ★                  | ★                       | ★           | ★             | ★                      | -                         | -                 | 8                                |

|                                                            |   |   |   |   |   |   |   |   |   |   |   |
|------------------------------------------------------------|---|---|---|---|---|---|---|---|---|---|---|
| Donnelly T et al, 2017 <sup>26</sup>                       | ★ | ★ | ★ | ★ | - | ★ | - | ★ | ★ | - | 7 |
| Fuh JL et al, 2009 <sup>29</sup>                           | ★ | ★ | ★ | ★ | ★ | ★ | ★ | ★ | ★ | - | 9 |
| Gladstein J et al, 1996 <sup>32</sup>                      | ★ | ★ | - | - | ★ | - | - | ★ | - | - | 4 |
| Guler G et al, 2017 <sup>38</sup>                          | ★ | - | - | ★ | - | - | - | ★ | - | - | 3 |
| Hommer J et al, 2021 <sup>42</sup><br>(migraine with aura) | ★ | ★ | - | ★ | ★ | ★ | - | ★ | ★ | ★ | 8 |
| Kafle M et al, 2022 <sup>47</sup>                          | ★ | - | ★ | ★ | ★ | ★ | ★ | ★ | ★ | - | 8 |
| Kaczynski K et al, 2013 <sup>46</sup>                      | ★ | ★ | ★ | ★ | - | - | - | ★ | ★ | - | 6 |
| Kröner-Herwig B et al, 2012 <sup>51</sup>                  | ★ | ★ | ★ | ★ | ★ | ★ | - | ★ | ★ | - | 8 |
| Laurell K et al, 2005                                      | ★ | ★ | - | ★ | ★ | - | - | ★ | ★ | - | 6 |
| Lucarelli E et al, 2009 <sup>53</sup>                      | - | - | - | ★ | - | - | - | ★ | ★ | - | 3 |
| Nesterov Y et al, 2015 <sup>64</sup>                       | - | - | - | ★ | - | - | - | ★ | - | - | 2 |
| Rabner J et al, 2018 <sup>72</sup>                         | ★ | - | - | ★ | ★ | - | ★ | ★ | ★ | - | 6 |
| Rousseau-Salvador C et al, 2013 <sup>74</sup>              | ★ | ★ | ★ | ★ | - | - | ★ | ★ | ★ | - | 7 |
| Rousseau-Salvador C et al, 2014 <sup>75</sup>              | ★ | ★ | - | ★ | - | - | - | ★ | ★ | - | 5 |
| Waldie K et al, 2014 <sup>87</sup>                         | ★ | - | - | ★ | - | - | - | ★ | ★ | - | 4 |

| Wang SJ et al, 2007 <sup>88</sup>         | ★                        | ★                                  | ★                          | ★                  | ★                       | -           | -             | ★                      | ★                         | -                 | 7                                |
|-------------------------------------------|--------------------------|------------------------------------|----------------------------|--------------------|-------------------------|-------------|---------------|------------------------|---------------------------|-------------------|----------------------------------|
| Wang SJ et al, 2009 <sup>90</sup>         | ★                        | -                                  | -                          | ★                  | ★                       | ★           | ★             | ★                      | ★                         | -                 | 7                                |
| Not fully meta-analyzed                   |                          |                                    |                            |                    |                         |             |               |                        |                           |                   |                                  |
| <i>Author</i>                             | <i>Study Methods</i>     |                                    |                            | <i>Selection</i>   |                         |             |               | <i>Exposure</i>        | <i>Applicability</i>      |                   | <i>Total (out of 10 domains)</i> |
|                                           | Design & sampling method | Report of estimates (CI, subgroup) | Adjustment for confounders | Outcome definition | Case representativeness | Sample size | Response rate | Exposure ascertainment | Study subject description | External validity |                                  |
| Bektas O et al, 2015 <sup>78</sup>        | ★                        | ★                                  | ★                          | ★                  | ★                       | ★           | ★             | ★                      | ★                         | -                 | 9                                |
| Braccili T et al, 1999 <sup>94</sup>      | -                        | -                                  | -                          | ★                  | -                       | -           | -             | ★                      | ★                         | -                 | 3                                |
| Heinrich M et al, 2007 <sup>41</sup>      | ★                        | -                                  | -                          | ★                  | ★                       | ★           | -             | ★                      | ★                         | -                 | 6                                |
| Kashikar-Zuck S et al, 2013 <sup>49</sup> | ★                        | ★                                  | ★                          | ★                  | -                       | -           | -             | ★                      | ★                         | -                 | 6                                |
| Lateef T et al, 2019 <sup>52</sup>        | ★                        | -                                  | -                          | ★                  | ★                       | -           | -             | ★                      | ★                         | ★                 | 6                                |
| Maleki N, 2016 <sup>57</sup>              | -                        | -                                  | -                          | -                  | -                       | -           | -             | -                      | -                         | -                 | 0                                |
| Onofri A et al, 2019 <sup>66</sup>        | -                        | -                                  | -                          | ★                  | -                       | -           | -             | ★                      | -                         | -                 | 2                                |
| Trent H et al, 2020 <sup>81</sup>         | ★                        | -                                  | -                          | -                  | -                       | -           | -             | -                      | -                         | -                 | 1                                |
| Wilcox S et al, 2018 <sup>91</sup>        | ★                        | -                                  | -                          | -                  | ★                       | -           | -             | ★                      | ★                         | -                 | 4                                |

★ = domain satisfies quality requirement

- = domain does not satisfy quality requirement

**eTable 6. Risk of bias ratings for cohort studies**

| <b>Meta-analyzed</b>                 |                           |                                 |                        |                                      |                                               |                    |                       |                       |                                 |
|--------------------------------------|---------------------------|---------------------------------|------------------------|--------------------------------------|-----------------------------------------------|--------------------|-----------------------|-----------------------|---------------------------------|
| <i>Author</i>                        | <i>Selection</i>          |                                 |                        |                                      | <i>Comparability</i>                          | <i>Outcome</i>     |                       |                       | <i>Total (out of 8 domains)</i> |
|                                      | Cohort representativeness | Selection of non-exposed cohort | Exposure ascertainment | Absence of outcome at start of study | Comparability of cohorts (design or analysis) | Outcome assessment | Duration of follow-up | Adequacy of follow-up |                                 |
| Guidetti V et al, 1998 <sup>36</sup> | -                         | ★                               | ★                      | ★                                    | -                                             | ★                  | ★                     | -                     | 5                               |
| Hammond N et al, 2019 <sup>40</sup>  | ★                         | ★                               | -                      | -                                    | ★                                             | ★                  | ★                     | ★                     | 6                               |
| <b>Not fully meta-analyzed</b>       |                           |                                 |                        |                                      |                                               |                    |                       |                       |                                 |
| <i>Author</i>                        | <i>Selection</i>          |                                 |                        |                                      | <i>Comparability</i>                          | <i>Outcome</i>     |                       |                       | <i>Total (out of 8 domains)</i> |
|                                      | Cohort representativeness | Selection of non-exposed cohort | Exposure ascertainment | Absence of outcome at start of study | Comparability of cohorts (design or analysis) | Outcome assessment | Duration of follow-up | Adequacy of follow-up |                                 |

|                                      |   |   |   |   |   |   |   |   |   |
|--------------------------------------|---|---|---|---|---|---|---|---|---|
| Kroner J et al, 2013 <sup>50</sup>   | ★ | ★ | - | - | - | ★ | ★ | - | 4 |
| McGinley J et al, 2019 <sup>62</sup> | ★ | ★ | - | - | - | ★ | ★ | - | 4 |

★ = domain satisfies quality requirement

- = domain does not satisfy quality requirement

**Figure e1. Results of meta-analyses comparing migraine to healthy controls for internalizing symptoms and disorders (presented in forest plots)**

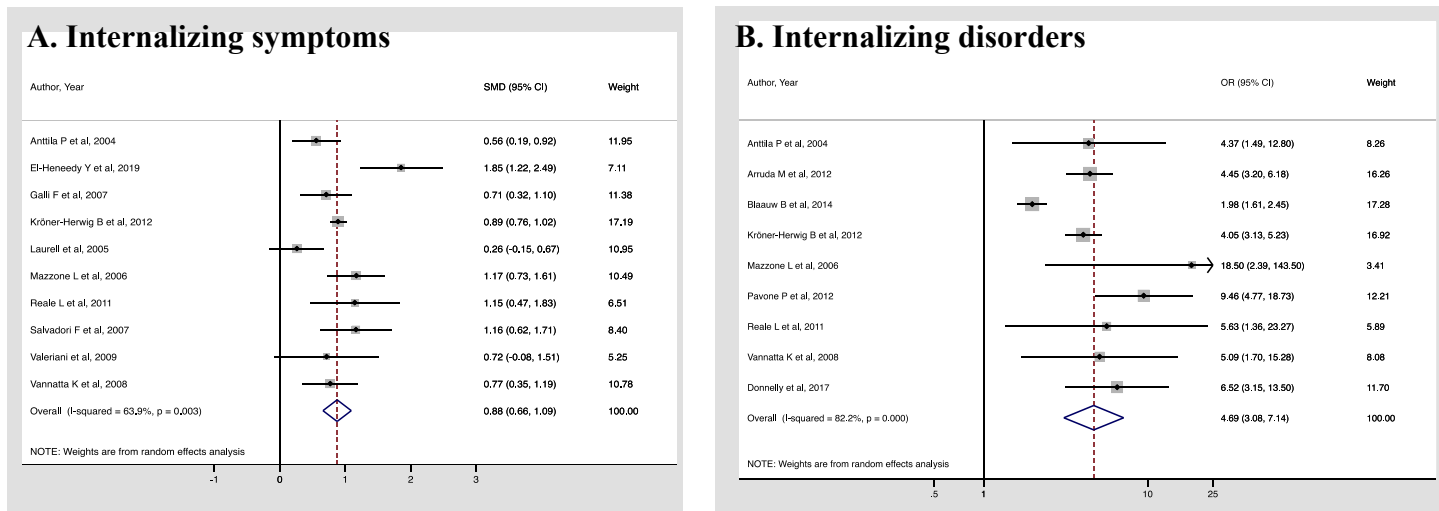

Forest plots illustrating pooled results of studies comparing migraine vs. healthy control samples on: A. internalizing symptoms<sup>45,27,30,51,53,61,73,77,84,85</sup> and B. internalizing disorders<sup>45,67,89,51,61,71,73,85,26</sup>

**Figure e2. Results of meta-analyses comparing migraine to other headache controls (presented in forest plots)**

**A. Anxiety symptoms**

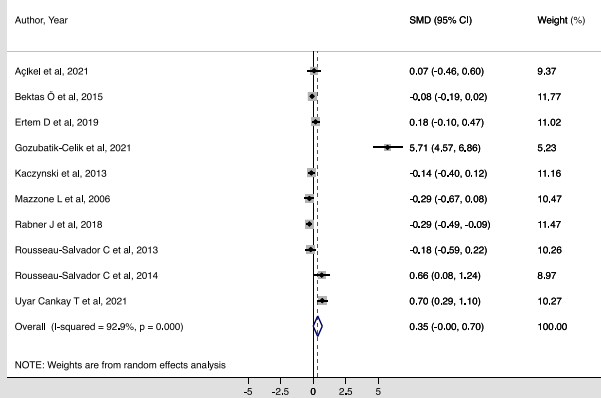

**B. Anxiety disorders**

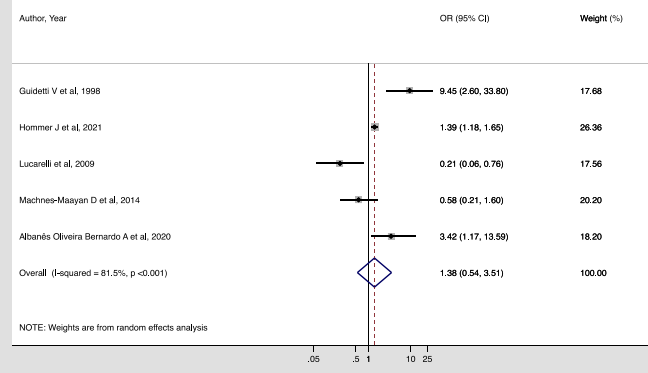

**C. Depressive symptoms**

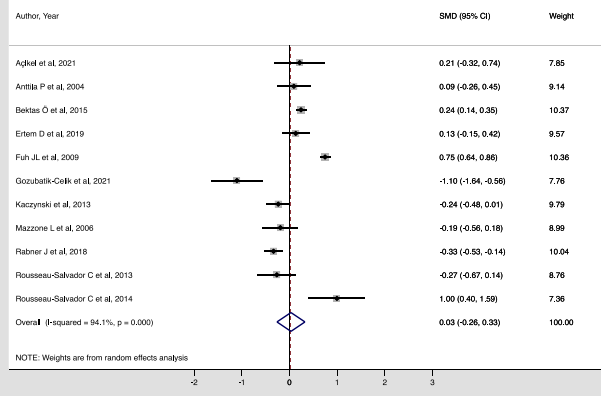

**D. Depressive disorders**

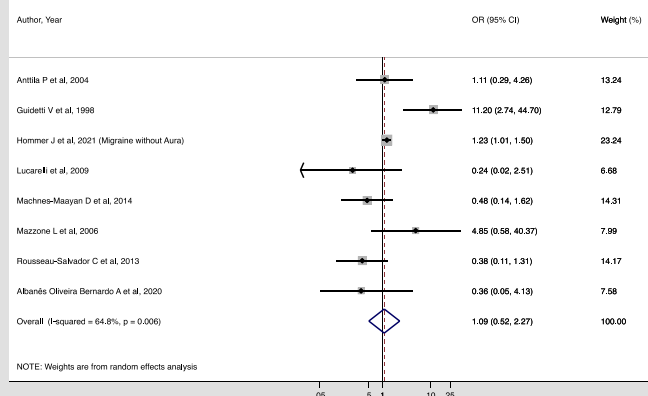

### E. Internalizing symptoms

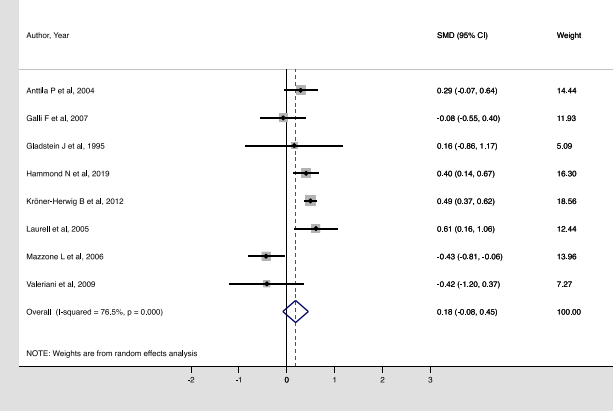

### F. Internalizing disorders

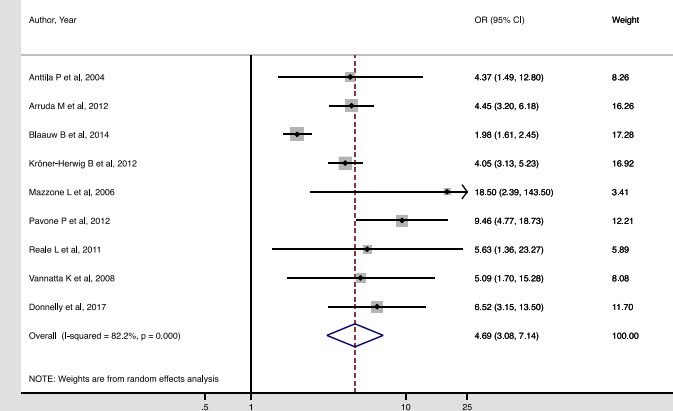

Forest plots illustrating pooled results of studies comparing migraine vs. other headache control samples on: A. anxiety symptoms<sup>22,78,28,33,46,61,72,74,75,83</sup>, B. anxiety disorders<sup>36,42,54,55,23</sup>, C. depressive symptoms<sup>22,45,78,28,29,33,46,61,72,74,75</sup>, D. depressive disorders<sup>45,36,42,54,55,61,74,23</sup>, E. internalizing symptoms<sup>45,30,32,40,51,53,61,84</sup>, and F. internalizing disorders<sup>45,67,89,51,61,71,73,85,26</sup>

**eTable 7. Sensitivity analyses with removal of outlying studies**

| <b>Studies</b>          |                      |                |                                       |                                          | <b>Sensitivity Analysis Data</b> |                                     |
|-------------------------|----------------------|----------------|---------------------------------------|------------------------------------------|----------------------------------|-------------------------------------|
| <i>Exposure Type</i>    | <i>Control Group</i> | <i>Measure</i> | <i>N Studies in Original Analysis</i> | <i>N Studies in Sensitivity Analysis</i> | <i>Original Results</i>          | <i>Sensitivity Analysis Results</i> |
| Anxiety symptoms        | Healthy controls     | SMD (95% CI)   | 16                                    | 15                                       | 1.13 (0.64-1.63)                 | 0.82 (0.38-1.26)                    |
| Anxiety disorders       | Healthy controls     | OR (95% CI)    | 15                                    | 14                                       | 1.93 (1.49-2.50)                 | 1.87 (1.47-2.37)                    |
| Depressive symptoms     | Healthy controls     | SMD (95% CI)   | 17                                    | 16                                       | 0.67 (0.46-0.87)                 | 0.56 (0.38-0.74)                    |
| Depressive disorders    | Healthy controls     | OR (95% CI)    | 18                                    | N/A                                      | 2.01 (1.46-2.78)                 | N/A (no outliers)                   |
| Internalizing symptoms  | Healthy controls     | SMD (95% CI)   | 10                                    | 9                                        | 0.88 (0.66-1.09)                 | 0.80 (0.62-0.98)                    |
| Internalizing disorders | Healthy controls     | OR (95% CI)    | 9                                     | 8                                        | 4.69 (3.08-7.14)                 | 4.46 (2.93-6.79)                    |
